1 **Title: CAMSAP2 organizes a  $\gamma$ -tubulin-independent microtubule**  
2 **nucleation centre**

3

4 Tsuyoshi Imasaki<sup>1-3†</sup>, Satoshi Kikkawa<sup>1†</sup>, Shinsuke Niwa<sup>4\*</sup>, Yumiko Saijo-Hamano<sup>1</sup>,  
5 Hideki Shigematsu<sup>5</sup>, Kazuhiro Aoyama<sup>6,7</sup>, Kaoru Mitsuoka<sup>7</sup>, Mari Aoki<sup>3</sup>, Ayako  
6 Sakamoto<sup>3</sup>, Yuri Tomabechi<sup>3</sup>, Naoki Sakai<sup>5</sup>, Mikako Shirouzu<sup>3</sup>, Shinya Taguchi<sup>1</sup>,  
7 Yosuke Yamagishi<sup>1</sup>, Tomiyoshi Setsu<sup>1</sup>, Yoshiaki Sakihama<sup>1</sup>, Takahiro Shimizu<sup>1</sup>, Eriko  
8 Nitta<sup>1</sup>, Masatoshi Takeichi<sup>8</sup>, Ryo Nitta<sup>1,3\*</sup>

9

10 *<sup>1</sup>Division of Structural Medicine and Anatomy, Department of Physiology and Cell*  
11 *Biology, Kobe University Graduate School of Medicine, Kobe, 650-0017, Japan*

12 *<sup>2</sup>JST, PRESTO, Saitama, 332-0012, Japan*

13 *<sup>3</sup>RIKEN Center for Biosystems Dynamics Research, Yokohama, 230-0045, Japan*

14 *<sup>4</sup>Frontier Research Institute for Interdisciplinary Sciences, Tohoku University, Sendai,*  
15 *980-0845, Japan*

16 *<sup>5</sup>RIKEN SPring-8 Center, Hyogo, 679-5148, Japan*

17 *<sup>6</sup>Materials and Structural Analysis (ex FEI), Thermo Fisher Scientific, Tokyo, 140-*  
18 *0002, Japan*

19 *<sup>7</sup>Research Center for Ultra-High-Voltage Electron Microscopy, Osaka University,*  
20 *Osaka, 567-0047, Japan*

21 *<sup>8</sup>RIKEN Center for Biosystems Dynamics Research, Kobe, 650-0047, Japan*

22

23 <sup>†</sup>These authors contributed equally to this work

24 For correspondence: [ryonitta@med.kobe-u.ac.jp](mailto:ryonitta@med.kobe-u.ac.jp), [shinsuke.niwa.c8@tohoku.ac.jp](mailto:shinsuke.niwa.c8@tohoku.ac.jp)

25

26

27 **Abstract:**

28 **Microtubules are dynamic polymers consisting of  $\alpha\beta$ -tubulin heterodimers. The**  
29 **initial polymerization process, called microtubule nucleation, occurs**  
30 **spontaneously via  $\alpha\beta$ -tubulin. Since a large energy barrier prevents microtubule**  
31 **nucleation in cells, the  $\gamma$ -tubulin ring complex is recruited to the centrosome to**  
32 **overcome the nucleation barrier. However, detachment of a considerable**  
33 **number of microtubules from the centrosome is known to contribute to**  
34 **fundamental processes in cells. Here, we present evidence that minus-end-**  
35 **binding calmodulin-regulated spectrin-associated protein 2 (CAMSAP2) serves**  
36 **as a strong nucleator for microtubule formation from soluble  $\alpha\beta$ -tubulin**  
37 **independent of  $\gamma$ -tubulin. CAMSAP2 significantly reduces the nucleation barrier**  
38 **close to the critical concentration for microtubule polymerization by stabilizing**  
39 **the longitudinal contacts among  $\alpha\beta$ -tubulins. CAMSAP2 clusters together with**  
40  **$\alpha\beta$ -tubulin to generate nucleation intermediates, from which numerous**  
41 **microtubules radiate, forming aster-like structures. Our findings suggest that**  
42 **CAMSAP2 supports microtubule growth by organizing a nucleation centre as**  
43 **well as by stabilizing microtubule nucleation intermediates. (147 words)**

44

45

## 46 **Introduction**

47 Microtubules are dynamic tubular polymers that contribute to fundamental processes  
48 in cells, such as cell shape determination, chromosome segregation, cilium and  
49 flagellum formation, and molecular motor trafficking (Desai and Mitchison, 1997).  
50 Microtubules are composed of  $\alpha\beta$ -tubulin heterodimers.  $\alpha$ -Tubulin and  $\beta$ -tubulin  
51 align in a head-to-tail manner to form protofilaments that associate laterally to grow  
52 into microtubules (Alushin et al., 2014; Nogales et al., 1999). The exposed  $\beta$ -tubulin  
53 end is called the plus-end, whereas the other side, the exposed  $\alpha$ -tubulin end, is called  
54 the minus-end. The microtubule plus-end is more dynamic than the minus-end; it  
55 dynamically alternates between growth and shrinkage. The dynamic events are  
56 regulated by many microtubule plus-end-tracking proteins (+TIPs) (Akhmanova and  
57 Steinmetz, 2015, 2008; Howard and Hyman, 2003). The minus-end is less dynamic  
58 and is responsible for determining the geometry of microtubule networks by stably  
59 anchoring at microtubule nucleation sites or the microtubule organizing centre  
60 (Akhmanova and Steinmetz, 2019; Dammermann et al., 2003).

61

62 Despite the identification of many +TIPs, only a few minus-end-binding proteins (-  
63 TIPs) have been reported, including  $\gamma$ -Tubulin and calmodulin-regulated spectrin-  
64 associated proteins (CAMSAPs).  $\gamma$ -Tubulin is located at centrosomes to nucleate  
65 microtubules and stabilize the microtubule minus-ends (Akhmanova and Steinmetz,  
66 2015).  $\gamma$ -Tubulin forms a ring complex ( $\gamma$ -TuRC), which serves as a nucleation  
67 template for centrosomal microtubule formation by aligning  $\alpha\beta$ -tubulins to form the  
68 tubular structure of the microtubule in a process called templated nucleation (Moritz  
69 et al., 1995; Roostalu and Surrey, 2017; Wieczorek et al., 2020; Zheng et al., 1995).  
70 CAMSAPs, the protein family composed of CAMSAP1-3 in vertebrates, Patronin in

71 *Drosophila melanogaster*, and PaTRoNin (microtubule-binding protein) homolog  
72 (PTRN-1) in *Caenorhabditis elegans*, have been reported to be involved in non-  
73 centrosomal microtubule formation (Goodwin and Vale, 2010; Marcette et al., 2014;  
74 Meng et al., 2008; Richardson et al., 2014; Wu et al., 2016). Although several *in vitro*  
75 reconstitution experiments have shown differences among CAMSAPs, CAMSAPs  
76 generally bind to the growing microtubule minus-ends and strongly suppress the  
77 dynamicity of non-centrosomal microtubules in different cell types, including neurons  
78 and epithelial cells (Chuang et al., 2014; Hannak et al., 2002; Jiang et al., 2014;  
79 Martin et al., 2018; Nashchekin et al., 2016; Noordstra et al., 2016; Pongrakhananon  
80 et al., 2018; Sampaio et al., 2001; Tanaka et al., 2012; Toya et al., 2016; Wu et al.,  
81 2016; Yau et al., 2014). The minus-end side of the microtubule lattice, but not the  
82 very end, is recognized by the CKK domain, although some additional effects were  
83 detected by other regions of CAMSAPs (Atherton et al., 2019, 2017). CAMSAPs  
84 have been reported to act in parallel with  $\gamma$ -TuRC-dependent microtubule nucleation,  
85 and the microtubule-severing protein katanin regulates the functions of CAMSAPs  
86 (Jiang et al., 2018; Wang et al., 2015; Wu et al., 2016). CAMSAPs are thought to be  
87 rapidly recruited to and to decorate pre-existing nascent microtubule minus-ends to  
88 sustain non-centrosomal microtubules. On the other hand, some reports have  
89 demonstrated the possibility that CAMSAP-containing foci are involved in promoting  
90 microtubule nucleation independently of  $\gamma$ -TuRC (Atherton et al., 2019; Jiang et al.,  
91 2018; Nashchekin et al., 2016) Thus, the mechanism by which CAMSAP2 proteins  
92 contribute to non-centrosomal microtubule organization has remained controversial.  
93  
94 Recent studies suggest that microtubules in cells often nucleate independently of the  
95  $\gamma$ -TuRC template (Hannak et al., 2002; O'Toole et al., 2012; Sampaio et al., 2001;



96 Yau et al., 2014). Therefore, we examined the roles of CAMSAPs in microtubule  
97 nucleation and microtubule network formation *in vitro*. In this study, we discovered  
98 the fundamental role of CAMSAP2 as a strong nucleator of microtubule formation  
99 from soluble  $\alpha\beta$ -tubulins. Our structural studies clearly demonstrated that CAMSAP2  
100 co-condenses with tubulins to stimulate spontaneous nucleation of microtubules  
101 without the  $\gamma$ -TuRC template. Many microtubule nucleation intermediates, tubulin  
102 rings, tubulin sheets, and their mixtures were observed inside the CAMSAP2-tubulin  
103 condensate during the early stages of microtubule polymerization. The CAMSAP2-  
104 tubulin condensate grows into the nucleation centre and mediates aster-like  
105 microtubule network formation *in vitro*, demonstrating the importance of CAMSAP2  
106 in non-centrosomal,  $\gamma$ -tubulin-independent microtubule nucleation processes.

107

## 108 **Results**

### 109 **Profiles of CAMSAP2 constructs used in *in vitro* biochemical, biophysical, and** 110 **structural assays.**

111 Before performing functional analyses of CAMSAP2, we examined the biochemical  
112 properties of the recombinant CAMSAP2 constructs used in this study by SDS-PAGE  
113 and size exclusion chromatography (Figure 1A). As shown in Figure 1B and C, full  
114 length CAMSAP2 with and without GFP-tag constructs were highly purified and  
115 showed a sharp symmetrical single peak in size exclusion chromatography,  
116 suggesting their homogeneous size distribution in solution. GFP-tagged full-length  
117 was eluted slightly faster than the non-tagged construct due to the size of GFP-tag,  
118 indicating both constructs should be in the same oligomeric state in solution.

119

120 We then analysed the microtubule binding pattern of recombinant full-length GFP-  
 121 CAMSAP2 by TIRF microscopy. The results showed that CAMSAP2 bound to the  
 122 microtubule lattice preferentially via the minus-ends, consistent with previous results  
 123 (Atherton et al., 2017; Jiang et al., 2014) (Figure 1D). These results collectively  
 124 indicate that the CAMSAP2 proteins used in this study retained their original ability  
 125 to bind to microtubule minus-ends.

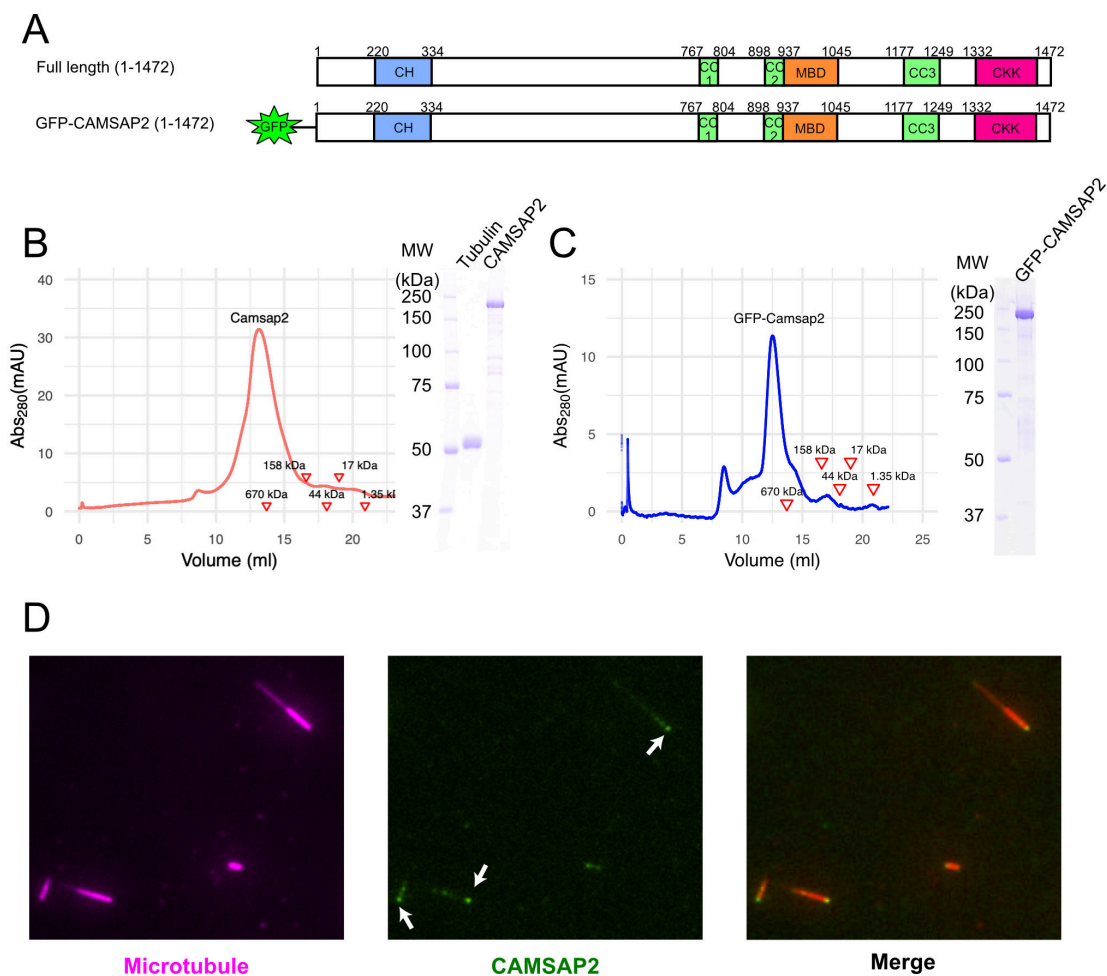

126

127 **Figure 1.** Functional study of recombinant CAMSAP2. (A) Schematic diagram of the full  
 128 length CAMSAP2 constructs used in this study. CH: calponin-homology domain; MBD:  
 129 microtubule-binding domain; CC: coiled-coil domain; CKK: C-terminal domain common to  
 130 CAMSAP1 and two other mammalian proteins, KIAA1078 and KIAA1543. (B)(C) Size  
 131 exclusion chromatography and SDS-PAGE of the peak fraction of (B) full-length CAMSAP2  
 132 and (C) GFP-CAMSAP2. (D) TIRF images of polarity-marked microtubules (magenta)  
 133 decorated with purified GFP-CAMSAP2 (green). The minus-end segment of the microtubule  
 134 is brighter than the plus-end segment.

135

136

137 **Microtubule nucleation with CAMSAP2 occurs at approximately the critical**  
138 **concentration for microtubule polymerization.**

139 Microtubule nucleation from  $\alpha\beta$ -tubulin heterodimers (hereafter called tubulin in the  
140 Results section) can occur spontaneously *in vitro* (Kuchnir Fygenson et al., 1995;  
141 Voter and Erickson, 1984). *De novo* microtubule nucleation *in vitro* requires a critical  
142 tubulin concentration greater than 20  $\mu$ M. This concentration is considerably higher  
143 than that required for elongation from existing microtubules, which is typically  
144 approximately 1-2  $\mu$ M and is called the critical concentration for microtubule  
145 polymerization ( $C_{\text{CMT polymerization}}$ ) (Wieczorek et al., 2015).

146

147 To test the nucleation ability of the purified pig tubulins used in this study, we  
148 performed a spin-down spontaneous nucleation assay through microtubule co-  
149 pelleting experiments *in vitro* (Wieczorek et al., 2015). Microtubule nucleation was  
150 induced by 60 min of incubation at 37 °C with high-speed centrifugation. To exclude  
151 non-specific aggregation during the microtubule pelleting assay, the microtubule  
152 pellets were resuspended and depolymerized on ice for 30 min. After incubation on  
153 ice, the samples were centrifuged again, and the supernatant was applied for SDS-  
154 PAGE analysis (Figure 2A). *De novo* nucleation of microtubules was detected just  
155 above the tubulin concentration of 20  $\mu$ M, which is consistent with a previous report  
156 (Wieczorek et al., 2015) (Figure 2A and C). The ratio of polymerized microtubules to  
157 unpolymerized tubulin increased proportionately with the tubulin concentrations.

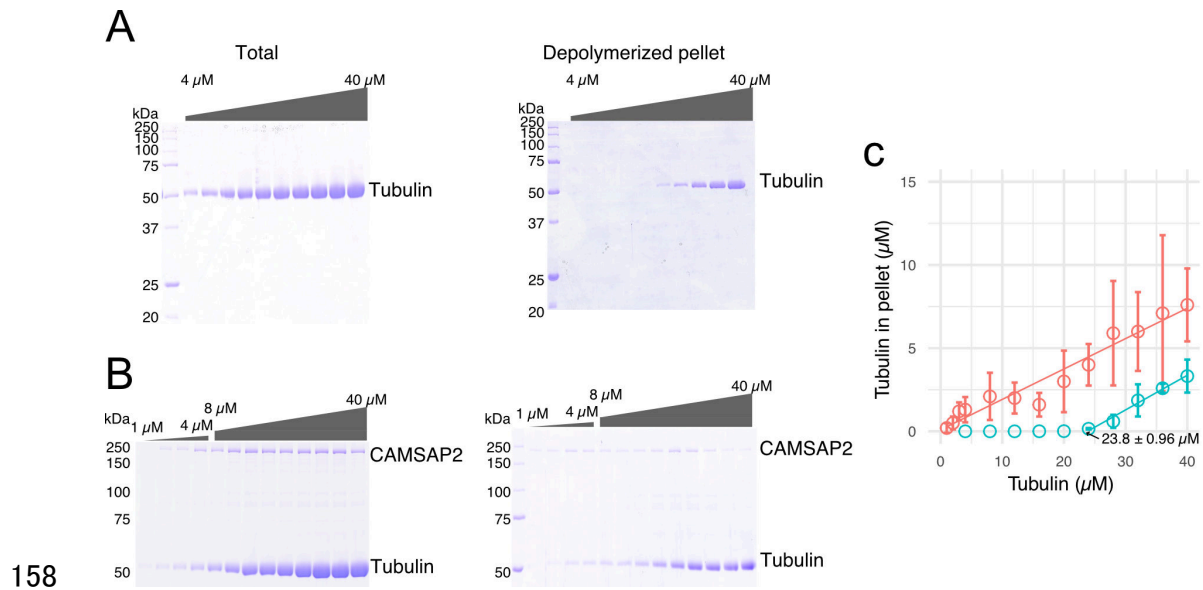

158 **Figure 2.** CAMSAP2 stimulates microtubule nucleation. (A) SDS-PAGE gels from a spin-  
159 down spontaneous nucleation assay of tubulin showing the total tubulin after 60 min of  
160 polymerization at 37 °C (left gel). Polymerized tubulin was pelleted by centrifugation and  
161 then depolymerized on ice and centrifuged to remove debris, and the supernatant was  
162 subjected to SDS-PAGE (right gel). (B) SDS-PAGE gels from a spin-down spontaneous  
163 nucleation assay of tubulin with 1 μM CAMSAP2 showing the total tubulin-CAMSAP2 (left  
164 gel) and the polymerized/depolymerized tubulin (right gel). (C) Plots of the depolymerized  
165 tubulin concentrations determined by pelleting assay against the total tubulin concentrations  
166 determined by reaction on SDS-PAGE gel from three independent assays. The depolymerized  
167 tubulin from the tubulin assay is turquoise green, and that combined with CAMSAP2 is  
168 orange. The concentrations of tubulin greater than 0.1 μM are fitted with a trend line that has  
169 an x-intercept of  $23.8 \pm 0.96 \mu\text{M}$ .  
170  
171

172

173 We then evaluated the effect of CAMSAP2 on microtubule nucleation by co-pelleting  
174 assay. Both tubulin and CAMSAP2 were pelleted from 1.0-2.0 μM, suggesting that  
175 tubulins in the presence of CAMSAP2 could polymerize into microtubules at 1.0-2.0  
176 μM, which is very close to the  $C_{\text{CMT}}$  polymerization (Figure 2B and C). This result  
177 suggests that CAMSAP2 drastically reduced the nucleation barrier close to the  
178 theoretical limit of microtubule polymerization. In this assay, both tubulin and  
179 CAMSAP2 in the pellet were recovered to the supernatant after depolymerization on  
180 ice, indicating that CAMSAP2 co-precipitates with microtubules. Similar to the  
181 behaviour of microtubule polymerization and depolymerization, CAMSAP2 forms a

182 reversible protein complex cluster with microtubules. Based on these results, we

183 concluded that CAMSAP2 significantly enhances the nucleation of tubulin by

184 forming a protein complex cluster with tubulins or microtubules.

185

186 **CAMSAP2 and tubulin co-condense to form aster-like structure.**

187 To investigate how CAMSAP2 affects the nucleation and polymerization of

188 microtubules, we co-polymerized 10  $\mu\text{M}$  of tubulin with CAMSAP2 and observed

189 them by fluorescence microscopy. Tetramethylrhodamine (TMR, 10  $\mu\text{M}$ )-labelled

190 tubulin was co-incubated with 10 to 1,000 nM full-length GFP-CAMSAP2 at 37 °C

191 for 10 min (Figure 3A). Surprisingly, CAMSAP2 co-condensed with tubulin and

192 microtubule bundles extended radially outward from the condensates (Figure 3B).

193 Their shapes were reminiscent of the centrosomal aster; thus, we named them as

194 "Cam2-asters". Cam2-asters appeared from 250 nM CAMSAP2, and the number of

195 asters increased as the CAMSAP2 concentration increased from 250 to 1,000 nM

196 CAMSAP2 (Figure 3B and C). CAMSAP2 localized mainly at the central regions of

197 Cam2-asters.

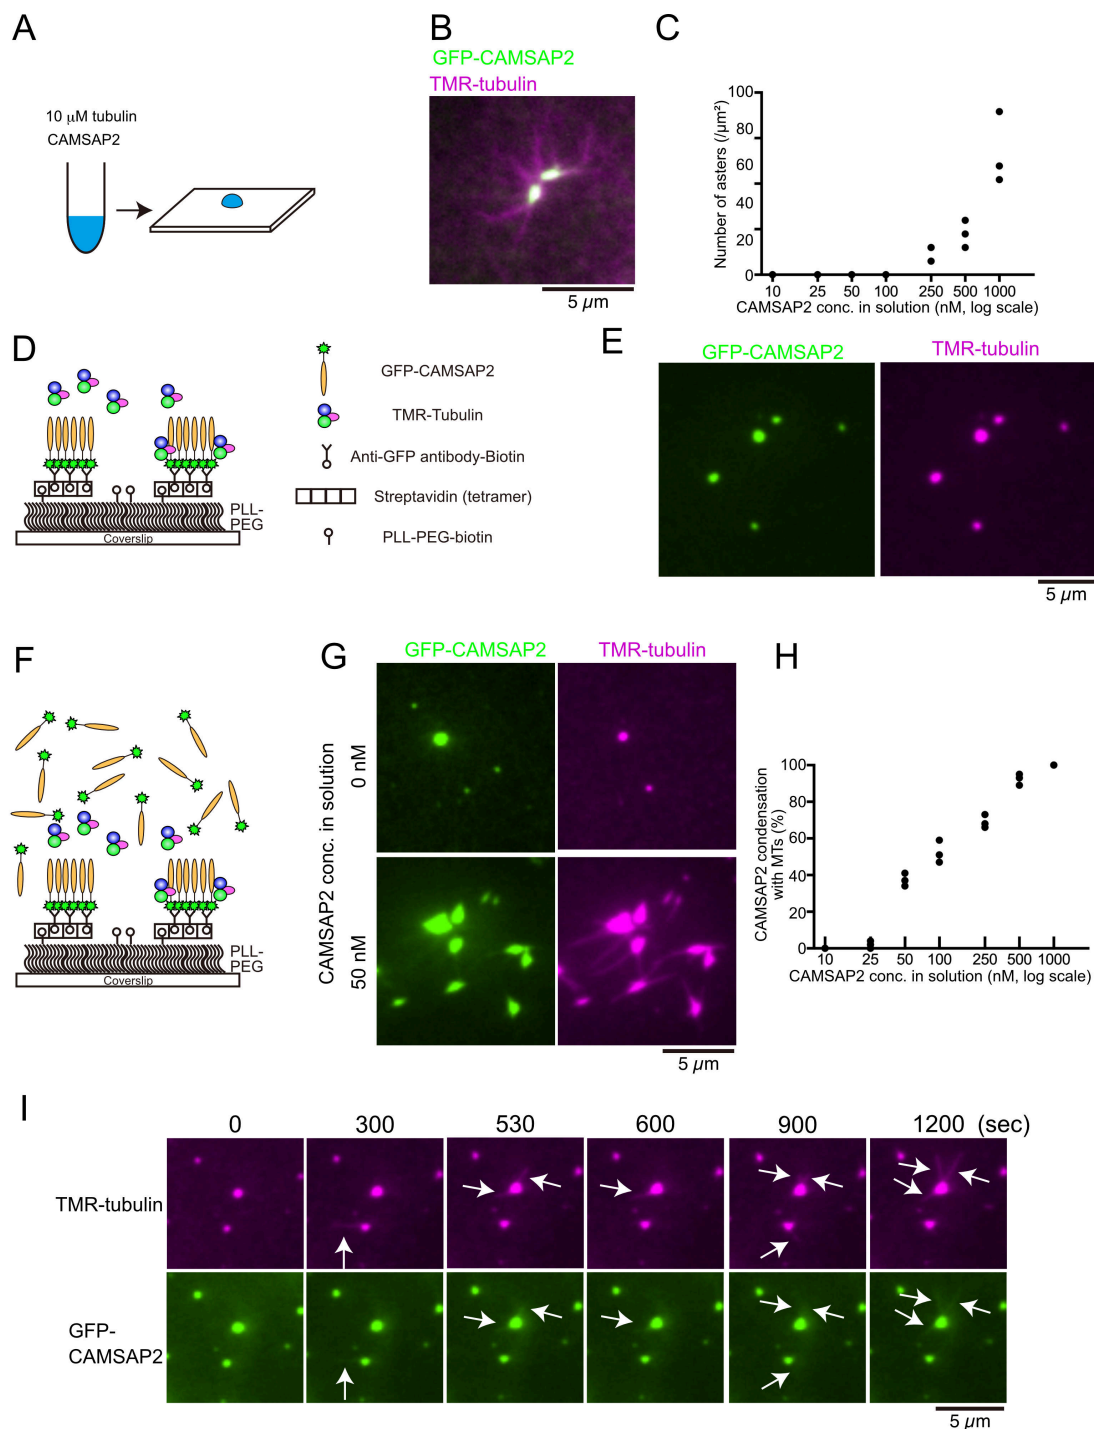

198

199 **Figure 3.** Tubulin is incorporated into CAMSAP2 clusters to form aster-like structure. (A)  
 200 Procedure used to obtain the data in panels (B) and (C). GFP-CAMSAP2, 10  $\mu$ M tubulin and  
 201 0.5  $\mu$ M TMR-tubulin were mixed in BRB80 supplemented with 100 mM KCl and incubated  
 202 for 10 min at 37  $^{\circ}$ C. The solution was directly transferred onto a coverslip and observed by  
 203 fluorescence microscopy. (B) Representative image of asters. GFP-CAMSAP2 (0.5  $\mu$ M),  
 204 tubulin (10  $\mu$ M) and TMR-tubulin (0.5  $\mu$ M) were co-incubated. (C) Quantification of the  
 205 numbers of asters in solutions containing 10  $\mu$ M tubulin, 0.5  $\mu$ M TMR-tubulin and 10, 25, 50,  
 206 100, 250, 500, and 1000 nM CAMSAP2. The results of three independent assays are shown  
 207 with dots. (D) Schematic showing reconstitution of CAMSAP2-containing foci. (E) Soluble  
 208 tubulins were incorporated into CAMSAP2 condensates within 1 min. (F) Schematic showing

209 CAMSAP2-containing foci with soluble tubulin and CAMSAP2. (G) CAMSAP2 in solution  
210 induced aster formation from CAMSAP2 condensates in a dose-dependent manner.  
211 Representative images for 0 and 50 nM CAMSAP2 are shown. (H) Quantification of  
212 microtubule formation from CAMSAP2 condensates. The percentages of CAMSAP2  
213 condensates with microtubules among total CAMSAP2 condensates are shown. Each dot shows  
214 the results of three independent experiments. (I) Time-lapse images of aster formation. Tubulin  
215 (10  $\mu$ M), TMR-tubulin (0.5  $\mu$ M) and CAMSAP2 (50 nM) were incubated with CAMSAP2  
216 condensates fixed on coverslips. Dynamic microtubules from CAMSAP2 condensates were  
217 observed (arrows). The scale bars indicate 5  $\mu$ m. See *Videos 1-2*.

218

219 **Video 1.** Time-lapse movie of aster formation. Tubulin (10  $\mu$ M), TMR-tubulin (0.5  $\mu$ M) and  
220 CAMSAP2 (50 nM) were incubated with CAMSAP2 condensates fixed on coverslips. The size  
221 of the field is 81.9  $\mu$ m x 81.9  $\mu$ m. The frame rate is 0.2 frames/sec.

222

223 **Video 2.** Magnified movie of aster formation from 1. Dynamic microtubules from CAMSAP2  
224 condensates were clearly observed. The size of the field is 8.2  $\mu$ m x 8.2  $\mu$ m. The frame rate is  
225 0.2 frames/sec.

226

227

228 The CAMSAP2 concentration required for condensates formation *in vitro* was  
229 slightly higher than the physiological concentration of CAMSAP2 (Liebermeister and  
230 Klipp, 2006; Wühr et al., 2014). Previous reports have indicated that CAMSAPs are  
231 not only cytosolic but also concentrated at sub-cellular structures such as adherens  
232 junctions and the apical cortices of epithelial cells (Toya et al., 2016). These  
233 CAMSAP-containing foci have been suggested to be involved in promoting  
234 microtubule nucleation. To test this hypothesis, we reconstituted CAMSAP-  
235 containing foci *in vitro* using a streptavidin-biotin system (Figure 3D). In this system,  
236 theoretically, a maximum of three CAMSAP2 dimers were anchored to one biotin  
237 molecule that was attached to a coverslip. TMR-labelled tubulin was added to the  
238 CAMSAP2-containing foci and visualized by TIRF microscopy. Tubulin was  
239 efficiently incorporated into the CAMSAP2 foci within 1 min, although  
240 polymerization of microtubules was rarely observed (Figure 3E). We hypothesized  
241 that microtubule polymerization from CAMSAP2 foci may also require free



242 CAMSAP2. To test this hypothesis, we supplemented the buffer with 10 to 1,000 nM  
243 soluble CAMSAP2 (Figure 3F). As a consequence, microtubule formation was  
244 induced from the CAMSAP2 foci. CAMSAP2 at a concentration of 50 nM in solution  
245 was sufficient for efficient microtubule polymerization from the foci, and in the  
246 presence of 500 nM CAMSAP2, microtubule polymerization occurred at nearly 100%  
247 of foci (Figure 3G, H).

248

249 Next, we acquired time-lapse images of microtubules using GFP-labelled CAMSAP2  
250 and TMR-labelled tubulin by TIRF microscopy. We found that dynamic  
251 polymerization and depolymerization of microtubules occurred at CAMSAP2-  
252 containing foci (Figure 3I, Videos 1 and 2). Closer observations also indicated that  
253 CAMSAP2 was associated with these dynamic microtubules. These findings suggest  
254 that fixed foci of CAMSAP2 act as cores for microtubule polymerization, leading to  
255 the formation of Cam2-asters, and that soluble CAMSAP2 is also required for this  
256 process. Thus, it seems that CAMSAP2 plays a dual role, functioning as a  
257 microtubule-organizing centre and increasing the efficiency of microtubule  
258 polymerization.

259

### 260 **Functional domain mapping for CAMSAP2 microtubule-nucleation and Cam2- 261 aster formation.**

262 To visualize the further detail of Cam2-aster formation, we co-polymerized tubulin  
263 and CAMSAP2 and observed them by negative stain electron microscopy (EM). 10  
264  $\mu$ M Tubulin was incubated with 1  $\mu$ M CAMSAP2 at 37 °C for 30 min. Consistent  
265 with the results of the fluorescence microscopy assay described above, we observed  
266 that spherical shapes of condensates distributed throughout the grid (Figure 4A).



267 From the condensates, many microtubule bundles extended outward. Microtubule

268 bundles from the neighboring condensates further interacted with each other and

269 formed a dense microtubule meshwork (Figure 4A).

270

271 To further eliminate the possible artifacts of Cam2-aster network formation induced

272 by negative staining, we observed the samples by cryo-EM. Consequently, cryo-EM

273 clearly visualized the Cam2-asters (Figure 4B), although the centres of the asters were

274 too thick to be resolved by transmission electron microscopy (TEM) (Figure 4B).

275 From the CAMSAP2 clusters, plenty of microtubule bundles extended outward.

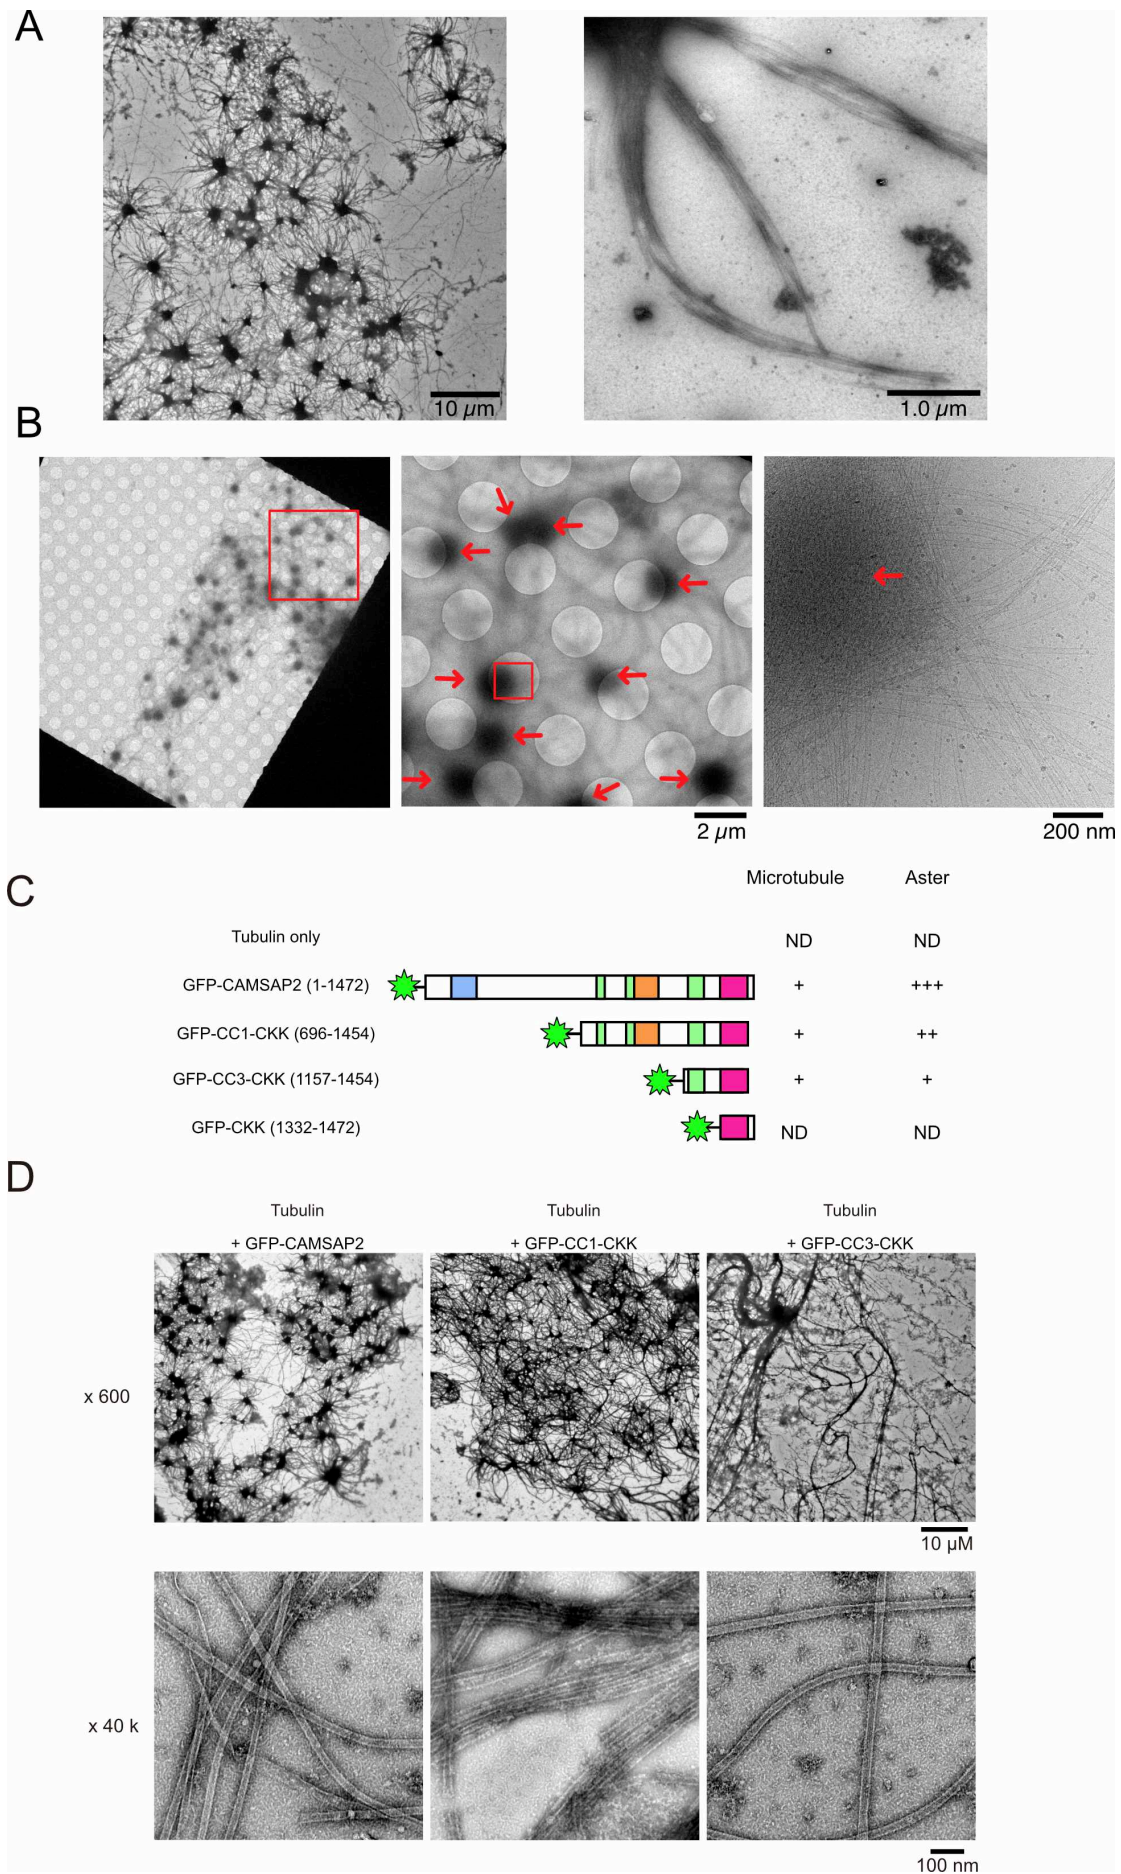

277 **Figure 4.** Functional domain mapping of the microtubule nucleation and aster formation  
 278 activity of CAMSAP2. (A) Negative stain EM micrographs of 10  $\mu$ M tubulin polymerized  
 279 with 1  $\mu$ M of CAMSAP2 after incubation at 37  $^{\circ}$ C for 10 min. Aster-like microtubule  
 280 structures were observed. The scale bars indicate 10  $\mu$ m and 1  $\mu$ m. (B) Cryo-EM micrographs  
 281 of 30  $\mu$ M tubulin polymerized with 3  $\mu$ M CAMSAP2 after incubation at 37  $^{\circ}$ C for 10 min  
 282 captured at different magnifications. Cam2-asters are indicated by the red arrows. (C)  
 283 Microtubule nucleation and aster formation activities of CAMSAP2 deletion constructs  
 284 evaluated by the results of 10  $\mu$ M tubulin with 1  $\mu$ M CAMSAP2. The number of “+” symbols  
 285 indicate the strength of the activity (+++: strongest; +: weakest; ND: not detected). Size  
 286 exclusion chromatography and SDS-PAGE of GFP fused constructs are available in Figure  
 287 4—figure supplement 1. (D) Negative stain EM images of polymerization by 10  $\mu$ M tubulin  
 288 with 1  $\mu$ M full-length CAMSAP2 or 1  $\mu$ M CAMSAP2 mutants during 10 min of incubation  
 289 at 37  $^{\circ}$ C. The results for tubulin alone and GFP-CKK are available in Figure 4—figure  
 290 supplement 2.  
 291

A

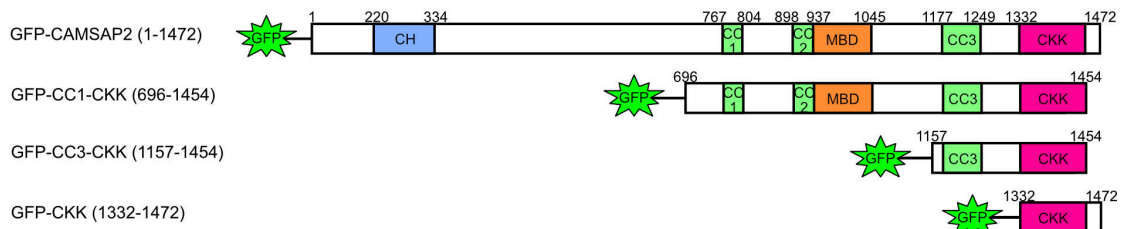

B

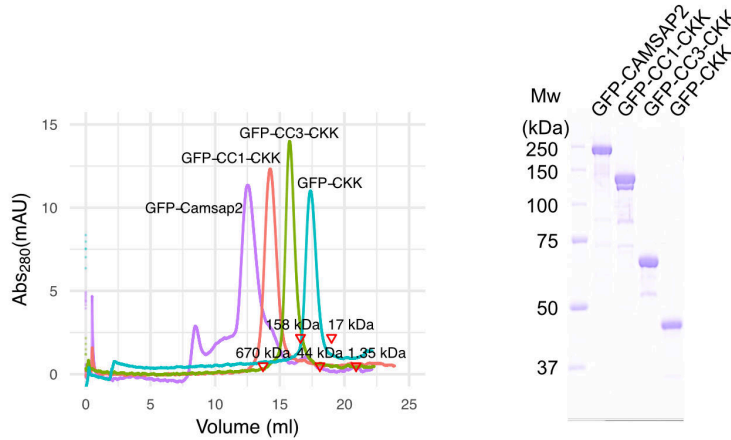

292

293 **Figure 4—figure supplement 1.** GFP fused CAMSAP2 constructs used in this study. (A)  
 294 Schematic diagram of the GFP fused CAMSAP2 constructs used in this study. (B) Size  
 295 exclusion chromatography of GFP-CAMSAP2 (purple), GFP-CC1-CKK (red), GFP-CC3-  
 296 CKK (green), and GFP-CKK (cyan). The peaks of each sample were subjected to SDS-  
 297 PAGE.  
 298

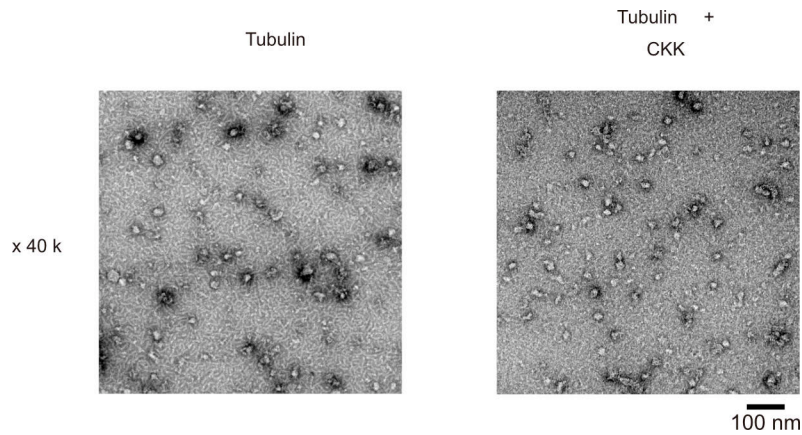

299

300 **Figure 4—figure supplement 2.** Functional domain mapping of CAMSAP2 analysed by  
301 negative stain EM. Ten-micromolar tubulin was incubated alone (left) or with 1  $\mu$ M GFP-  
302 CKK (right) at 37 °C for 10 min and analysed by negative stain EM.

303

304

305 Next, to identify the functional domain of CAMSAP2 for microtubule nucleation and

306 Cam2-aster formation, we prepared a series of N-terminal deletion constructs and

307 tested their functions (Figure 4C and Figure 4—figure supplement 1). Tubulin (10

308  $\mu$ M) was mixed with each of the CAMSAP2 mutants (1  $\mu$ M) on ice, incubated at

309 37 °C for 10 min, and examined for microtubule nucleation and aster-forming activity

310 (Figure 4C and 4D). No microtubules were observed after 10 min of incubation with

311 tubulin alone (Figure 4—figure supplement 2), consistent with the results of the

312 microtubule pelleting assay (Figure 2). Tubulin in the presence of full-length GFP-

313 CAMSAP2 produced a dense Cam2-aster network as described above (Figure 4D,

314 left), which functions equivalent to the no-GFP CAMSAP2. In the presence of CC1-

315 CKK, the Cam2-aster network was similarly observed, although the condensed region

316 of CAMSAP2-tubulin at the centre of each aster was smaller than that observed with

317 full-length CAMSAP2 (Figure 4D, centre). CC3-CKK could also form Cam2-asters,

318 but condensations were less represented and the meshwork was sparser than observed

319 for the full-length and CC1-CKK constructs (Figure 4D, right). We also examined the

320 copolymerization assay in the presence of CKK domain, which is the major binding



321 site for the microtubule. Consequently, polymerized microtubules and Cam2-asters  
322 were rarely observed in the presence of CKK (Figure 4—figure supplement 2). Thus,  
323 we concluded only CKK domain could not stimulate tubulin nucleation and Cam2-  
324 aster formation. Coiled-coil regions, at least the CC3 domain, are thus required for  
325 microtubule polymerization and Cam2-aster formation, which indicates that the CC3  
326 and CKK domains are the minimum requisites for microtubule nucleation and Cam2-  
327 aster formation by CAMSAP2.

328

### 329 **3D architecture of Cam2-aster observed by cryo-electron tomography.**

330 To understand the 3D architecture of Cam2-asters, we then performed cryo-electron  
331 tomography (cryo-ET) of mature Cam2-asters formed via 30 min of incubation of 10  
332  $\mu$ M tubulin with 1  $\mu$ M CAMSAP2 at 37 °C (Figure 5A and B, Video 3). In the  
333 tomogram, numerous microtubule bundles were observed to extend outward from the  
334 condensates of Cam2-asters. However, we still could not resolve their inner structures  
335 because the central regions of the mature Cam2-asters were too thick for the electron  
336 beam to penetrate, even with a 300 kV Titan Krios cryo-electron microscope. The  
337 distances among the microtubules in the bundle were not always uniform, and no  
338 cross-linking density, including that of CAMSAP2, was observed among them, at  
339 least at the current resolution (Figure 5A to C). Considering the localization of  
340 fluorescence CAMSAP2 at the condensates, CAMSAP2 should have mainly localized  
341 at the centre of the aster. Intriguingly, several microtubule ends with ring structures  
342 were observed close to the Cam2-aster centre (Figure 5D), as detailed later.

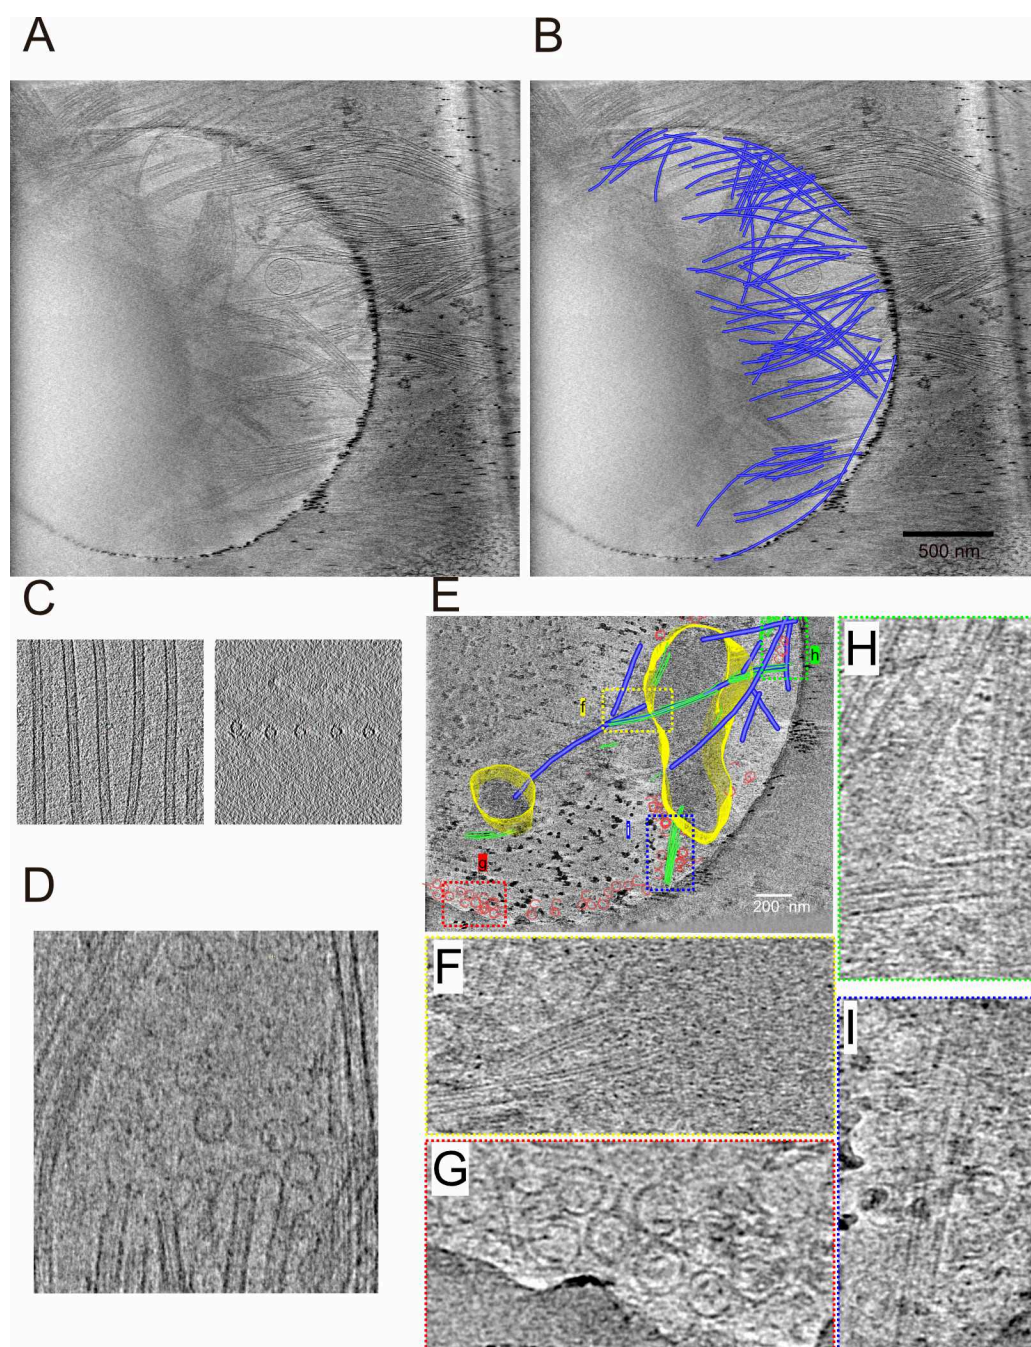

343

344 **Figure 5.** Cryo-ET reconstruction of Cam2-asters. (A) A 2.1 nm thick tomographic slice of a  
345 mature Cam2-aster processed by SIRT. See also *Video 3*. (B) Rendered microtubules (blue)  
346 from representative 600 nm thick tomographic slices overlaid with a tomographic slice. The  
347 centre of the Cam2-aster is located in the left area of the grid hole. (C) Typical views of  
348 microtubule bundles elongated from an aster are shown from different angles. (D) Ring  
349 structures were observed near the microtubule ends. (E)-(I) Tomographic reconstruction of a  
350 growing Cam2-aster processed by SIRT. See also *Video 4*. (E) Rendered view of a growing  
351 Cam2-aster from representative 120 nm thick tomography slices overlaid with a 2.4 nm  
352 tomographic slice. Centre of the Cam2-aster: yellow; microtubules: blue; tubulin sheets:  
353 green; tubulin rings: red. (F)-(I), Magnified views shown in panel (E).  
354

355 **Video 3.** Cryo-tomographic reconstruction of the mature Cam2-aster. SIRT processed cryo-  
356 tomographic reconstruction of the mature Cam2-aster produced by incubation of 10  $\mu$ M  
357 tubulin with 1  $\mu$ M full-length CAMSAP2 for 30 min at 37 °C.

358

359 **Video 4.** Cryo-tomographic reconstruction of the growing Cam2-aster. SIRT processed cryo-  
360 tomographic reconstruction of the growing Cam2-aster produced by incubation of 10  $\mu$ M  
361 tubulin with 1  $\mu$ M full-length CAMSAP2 for 1 min at 37 °C.

362

363 To further investigate the Cam2-aster formation mechanism, we next applied cryo-ET  
364 to the small growing Cam2-asters formed through 1 min of incubation at 37 °C  
365 (Figure 5E-I, Video 4). We detected small condensates corresponding to the  
366 nucleation centre (growing asters) on the grid surface (yellow in Figure 5E). Short  
367 polymerizing microtubules were connected to the nucleation centres (blue in Figure  
368 5E). Around these locations, vast numbers of small rings (red in Figure 5E and G) and  
369 sheet structures (green in Fig. 5E, H, I) were observed, although only a few rings were  
370 detectable in the mature Cam2-asters (Figure 5D). This finding suggests that rings and  
371 sheets may be important for the initial microtubule growth phase of Cam2-aster  
372 formation.

373

#### 374 **Ring structures observed during microtubule nucleation with CAMSAP2.**

375 To understand the detailed structural mechanism of nucleation centre formation, we  
376 aimed to analyse intermediates of tubulin nucleation. We chose CC1-CKK because  
377 the centres of Cam2-asters induced by full-length CAMSAP2 were too condensed and  
378 thick for TEM to observe the inner structures. CC1-CKK exhibited similar  
379 microtubule nucleation activity with smaller condensation of the nucleation centre  
380 than full-length CAMSAP2 (Figure 4D). We analysed the time courses of  
381 microtubule nucleation and aster formation using CC1-CKK by negative stain EM  
382 (Figure 6A). Surprisingly, incubation of 10  $\mu$ M tubulin with 1  $\mu$ M CC1-CKK for 30



383 min on ice induced the formation of numerous rings with diameters of approximately  
384 50 nm (Figure 6A), which was not observed in the tubulin-alone condition (Figure 4—  
385 figure supplement 2). After 1 min of incubation at 37 °C, many short microtubules  
386 polymerized, with slightly fewer rings than in the on-ice condition. Increasing the  
387 incubation time increased the microtubule number and length; in contrast, it further  
388 decreased the number of rings (Figure 6A and 6B). The ring number was the highest  
389 when incubation was conducted on ice, suggesting that the rings likely represent a  
390 molecular state of tubulins before their polymerization is initiated. The number started  
391 to decrease after incubation at 37 °C, and only a few rings were observed in the  
392 background after 10 min of incubation.

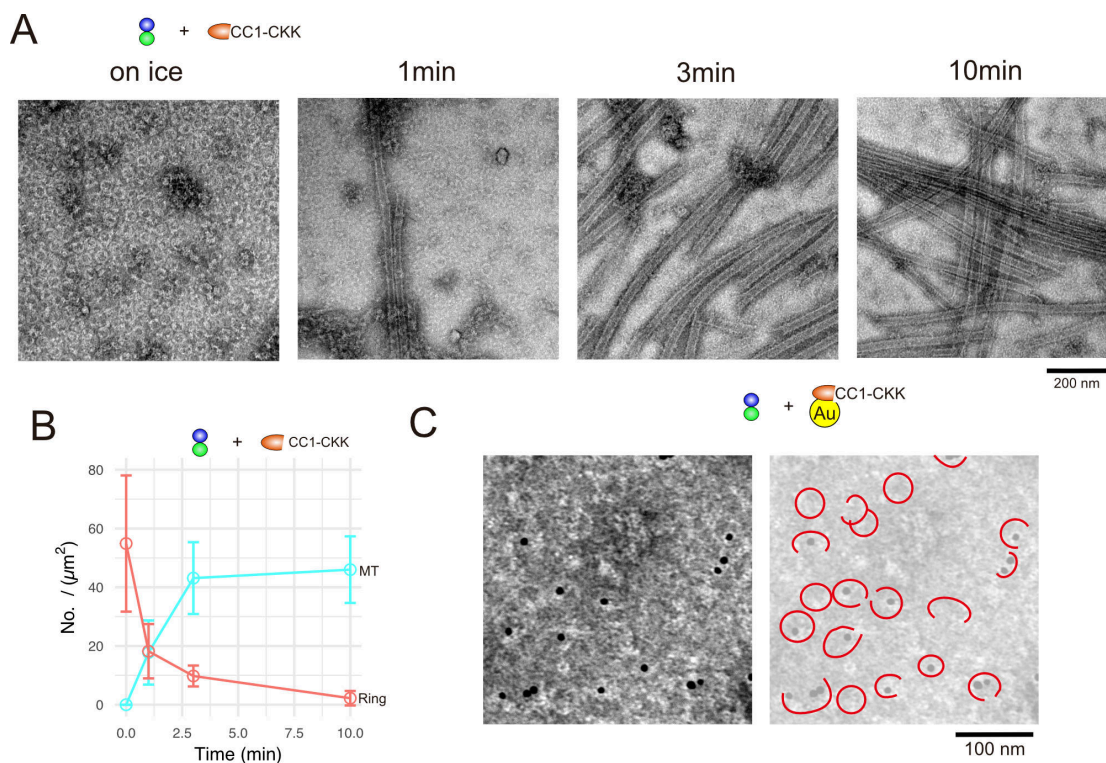

393

394 **Figure 6.** CAMSAP2 induces tubulin ring formation. (A) Negative stain EM micrographs of  
395 10 µM tubulin polymerization with 1 µM CAMSAP2 CC1-CKK at different time points. (B)  
396 Plots of the number of tubulin rings (orange) and that of microtubules (turquoise green) at  
397 different time points (mean ± SD, from 10 independent views). (C) Negative stain EM  
398 micrographs of 10 µM tubulin with 1 µM nano-gold-labelled CAMSAP2 CC1-CKK mixed  
399 on ice for 30 min. Quality of the nano-gold labeled CAMSAP2 CC1-CKK was analyzed by  
400 negative stain EM. See Figure 6—figure supplement 1.

401



402

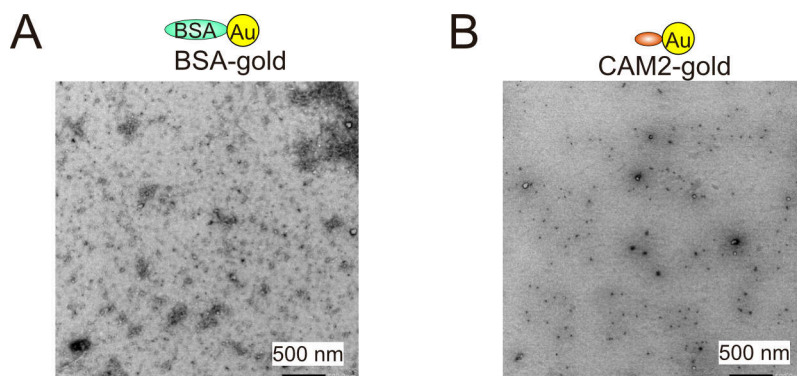

403

404 **Figure 6—figure supplement 1.** Nano-gold labelling of CAMSAP2. (A) Negative stain EM  
405 micrographs of 1  $\mu$ M nano-gold-labelled BSA. (B) Negative stain EM micrographs of 1  $\mu$ M  
406 nano-gold-labelled CAMSAP2 CC1-CKK.

407

408

409 To further examine the localization of CAMSAP2 during ring formation, we labelled  
410 CC1-CKK CAMSAP2 with nano-gold, mixed it with tubulin, and observed its  
411 localization by negative stain EM (Figure 6C). Suggestively, nano-gold densities were  
412 present at the centres of the rings or crescent-shaped tubulin oligomers (Figure 6C,  
413 black dots). It should be noted that CAMSAP2 itself was uniformly distributed and  
414 did not form any clusters on ice. Combining these results with those showing that the  
415 ring number decreased during incubation at 37  $^{\circ}$ C (Figure 6B), we can postulate that  
416 CAMSAP2 contributes to the formation of tubulin oligomers or rings and may be  
417 used as a material for initial short tubulin sheet and microtubule formation.

418

419 **CAMSAP2-induced microtubule nucleation intermediates observed by cryo-EM.**

420 To visualize the structural details of the nucleation centres during Cam2-aster growth,  
421 we used cryo-EM to observe this process at three time points. We incubated the  
422 tubulin–CC1-CKK mixture on ice for 30 min, at 37  $^{\circ}$ C for 1 min, and at 37  $^{\circ}$ C for 3  
423 min. The concentrations of tubulin and CC1-CKK were set to 30  $\mu$ M and 3  $\mu$ M,

424 respectively; the ratio was identical to that used for negative stain EM, but the  
425 concentration of each molecule was tripled to observe the rings or sheets more  
426 efficiently.

427

428 Consistent with our negative stain EM results, many tubulin rings or tubulin  
429 oligomers with crescent shapes were observed in the on-ice condition (Figure 7A and  
430 red in Figure 7B), whereas those structures were not observed in the tubulin-alone  
431 condition (Figure 7—figure supplement 1a, b). In these specimens, short tubulin  
432 sheets were also observed on ice (green in Figure 7B). Furthermore, we detected  
433 semicircular or crescent-shaped tubulin oligomers that were multiply stacked and  
434 partly flattened, suggestive of the intermediates between rings and sheets (orange in  
435 Figure 7B). Intriguingly, some densities were observed inside the rings (Figure 7C)  
436 that resembled the CAMSAP2 in the rings detected by negative stain EM with nano-  
437 gold labelling (Figure 6C). To investigate the ring structures in further detail, we  
438 performed 2D class averaging of rings from cryo-EM micrographs (Figure 7D). The  
439 rings were apparently not uniform; single rings, double rings, and spiral rings were  
440 observed. Depending on the lengths of tubulin oligomers, several forms of tubulin  
441 rings were produced. 2D classification of the rings clearly showed bumps around the  
442 ring surface corresponding to the individual tubulin monomers (Figure 7D). Weak  
443 irregular densities could still be observed in the spiral rings, which were the 2D  
444 averages of 40-100 particles. The diameters and pitches of the bumps resemble those  
445 of longitudinal protofilament rings, rather than the tubulin rings made by the lateral  
446 contacts like the  $\gamma$ -TuRC (Figure 7E).



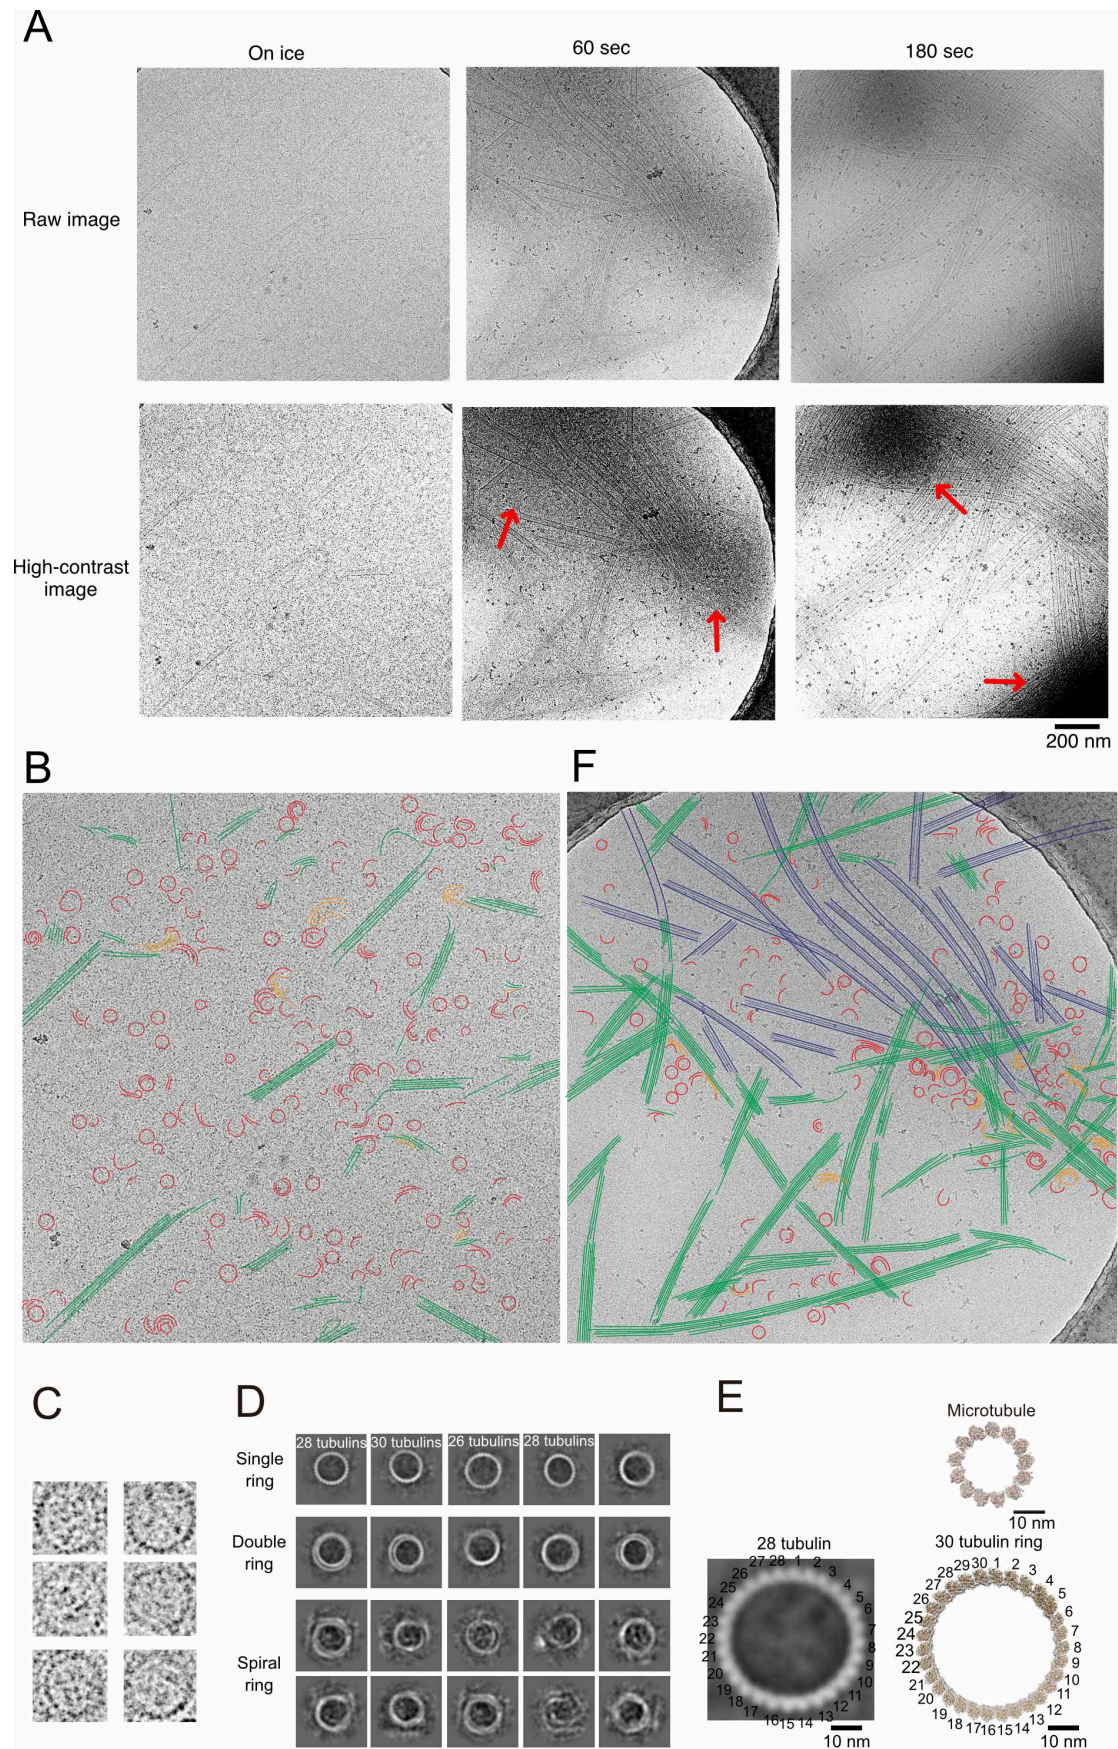

447

448 **Figure 7.** CAMSAP2 induced microtubule nucleation intermediates visualized by time-lapse  
 449 cryo-EM. (A) Snapshots of growing microtubule intermediates at different time points and



450 with different contrasts. The red arrows indicate high-density condensed areas. (B)  
451 Segmentation of the structural elements of micrographs from panel (A) (on ice). Tubulin  
452 rings: red; intermediates between ring and sheet: orange; tubulin sheets: green. (C) Ring  
453 images cropped from cryo-EM micrographs. Amorphous density could be observed in the  
454 ring. (D) 2D classification of tubulin rings. Rings of different shapes and sizes were observed,  
455 including single rings, spiral rings, and double rings. (E) Comparison of 2D average of 28  
456 tubulin rings (left) with the single protofilament (PF) ring (bottom right) and the 13-PF  
457 microtubules seen from the plus-end (top right). The scale bars indicate 10 nm. The PF ring  
458 was generated by cropping outer microtubule ring from Microtubule-KLP10A map (EMD-  
459 7026) using its model (PDB: 6b0c) as a guide. (F) Segmentation of the structural elements of  
460 the micrographs from (A) (60 sec). Tubulin rings: red; intermediates between ring and sheet:  
461 orange; tubulin sheets: green; microtubules: blue.  
462

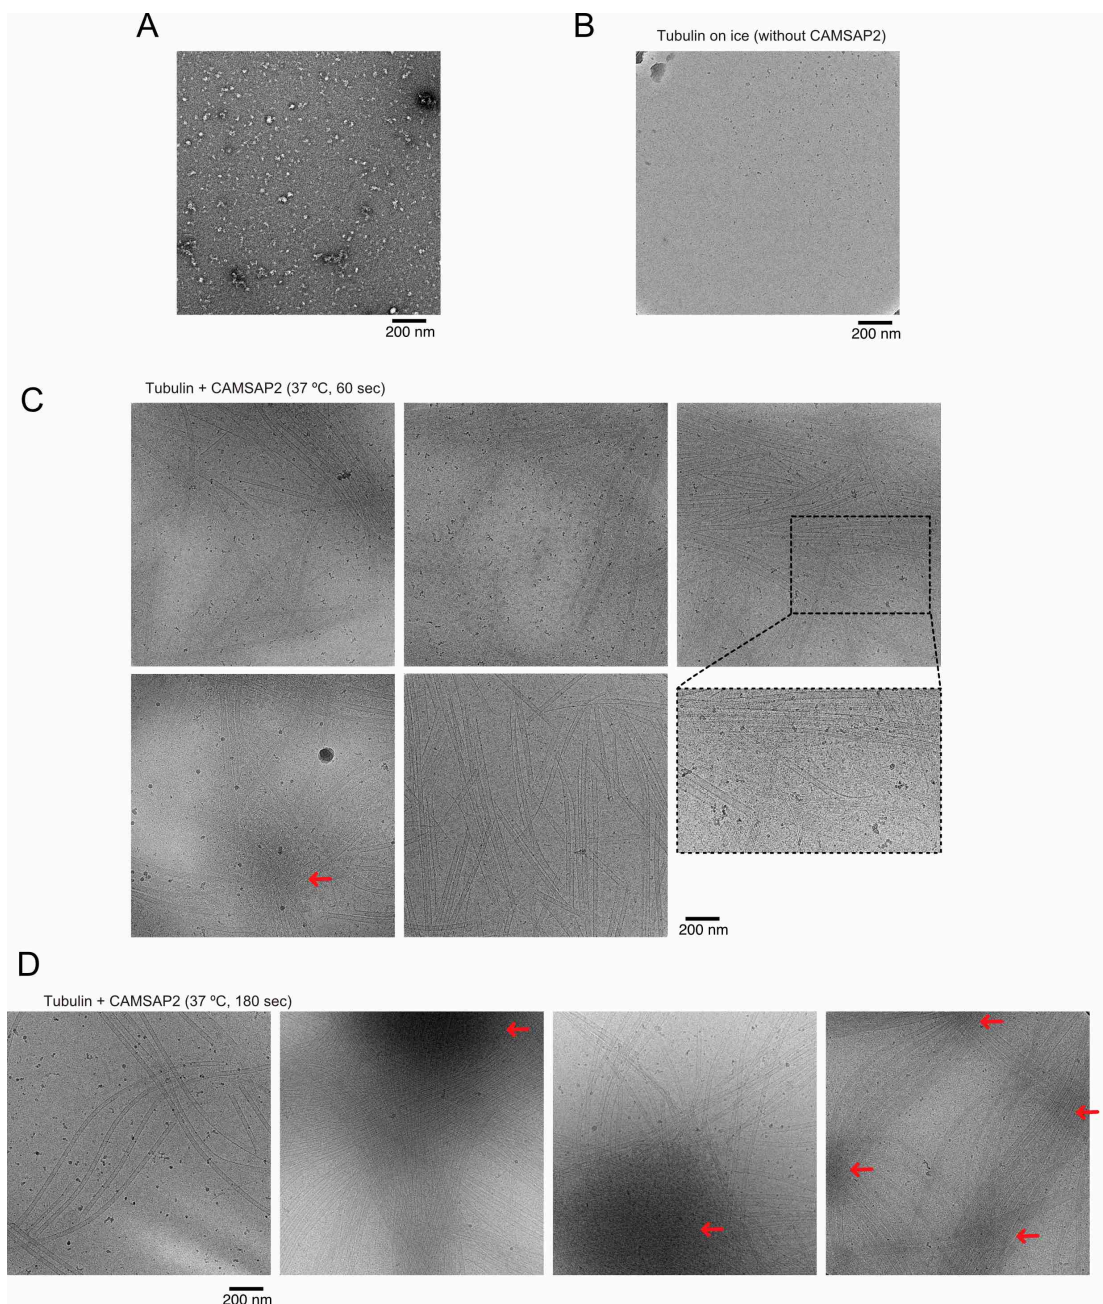

463

464 **Figure 7—figure supplement 1.** Cryo-EM visualization of Cam2-aster formation. (A)  
465 Negative stain image of 10  $\mu$ M tubulin on ice. (B) Cryo-EM image of 30  $\mu$ M tubulin on ice  
466 without CAMSAP2. (C) Cryo-EM images of growing microtubules with CAMSAP2 CC1-  
467 CKK after 60 sec of incubation at 37 °C. The enlarged panel shows examples of partially  
468 curved sheet-like microtubule ends, which are characteristic of growing microtubules. (D)  
469 Cryo-EM images of growing microtubules with CAMSAP2 CC1-CKK after 180 sec of  
470 incubation at 37 °C. The red arrows in panels C and D indicate high-density condensed areas.  
471

472

473 Cryo-EM snapshots of the samples incubated at 37 °C for 1 min and 3 min clearly  
474 illustrated transient steps of microtubule nucleation and growth (Figure 7A and 7F).  
475 Before polymerization was initiated by increasing the temperature, tubulin rings,  
476 intermediates between rings and sheets, and tubulin sheets were uniformly distributed  
477 throughout the grid surface (Figure 7A). Incubation at 37 °C incubation further  
478 stimulated tubulin sheet formation; thus, the numbers and lengths of sheets were  
479 tremendously increased. After 1 minute of incubation at 37 °C, rings and short sheets  
480 tended to gather together to form a high-density condensed area (red arrow in Figure  
481 7A, 60 sec). After 3 min of incubation, the condensates became denser, forming the  
482 central regions of Cam2-asters (red arrow in Figure 7A, 180 sec). These observations  
483 suggest that incubation at 37 °C induces the condensation of tubulin intermediates  
484 with CAMSAP2, which stimulates tubulin sheet and microtubule formation, resulting  
485 in rapid growth of Cam2-asters.

486

487 Next, we more closely investigated the structural details of the aster centres. The  
488 centres were filled with microtubule intermediates, including rings, intermediates  
489 between rings and sheets, sheets, and short microtubules (Figure 7F). Rings were also  
490 aligned along the elongating tubulin sheets that radiated from the condensates,  
491 although only a few rings were observed around mature microtubules. Some rings and  
492 sheets were assembled together, resembling the process of integration of

493 protofilaments into tubulin sheets (orange in Figure 7F). Around the regions where  
494 numerous rings existed, the ends of microtubules or tubulin sheets often exhibited  
495 partially curved sheet-like structures that are characteristically observed for growing  
496 microtubules (Figure 7—figure supplement 1C). On the other hand, fully curved ends  
497 that are often observed for depolymerized microtubules were rarely observed.

498

499 It should be emphasized that the tubulin rings were produced on ice when no  
500 microtubules were formed. This means that the tubulin rings observed here were  
501 likely not the products of microtubule depolymerization; rather, they could be  
502 incorporated into tubulin sheets to form microtubules. We therefore conclude that  
503 CAMSAP2 facilitates protofilament ring formation and that the rings, including single  
504 rings, spiral rings, and double rings, should be nucleation intermediates that grow into  
505 microtubules through tubulin sheets that function as critical nuclei for microtubule  
506 polymerization.

507

508

## 509 **Discussion**

510 We report here that CAMSAP2 functions as a nucleator of microtubule formation  
511 from soluble  $\alpha\beta$ -tubulin dimers. CAMSAP2 reduces the nucleation concentration  
512 barrier for microtubule polymerization to 1-2  $\mu\text{M}$ , which is similar to the tubulin  
513  $C_{\text{CMT}}$  polymerization. The acceleration of microtubule nucleation is achieved by the  
514 efficient formation of microtubule polymerization intermediates made of  
515 protofilaments inside condensed nucleation centres, which function as nucleation  
516 centres for microtubule polymerization. Each condensed region grows into the centre  
517 of a Cam2-aster, from which numerous dynamic microtubules elongate in a radial

518 fashion. Microtubules from neighbouring asters join together to form the dense  
519 meshwork. These results suggest that CAMSAP2 contributes considerably to the  
520 fundamental step of microtubule network formation.

521

522 Our structural study indicates that CAMSAP2 induces longitudinal growth of  $\alpha\beta$ -  
523 tubulin to form a protofilament ring. Remarkably, this reaction can proceed on ice  
524 even though microtubule polymerization is not generally observed under such  
525 conditions. In the presence of CAMSAP2, tubulin ring and short sheet formation was  
526 observed on ice, and the resulting structures were distributed with uniformity. When  
527 the temperature is increased to 37 °C, tubulin rings start gathering with CAMSAP2 to  
528 form molecular clusters that will become the nucleation centres for future Cam2-  
529 asters. This molecular condensate efficiently nucleates microtubules, and is reversible  
530 and sensitive to temperature and salt concentration. In this regard, the behaviour of  
531 CAMSAP2 apparently resembles that of TPX2, the targeting protein for Xklp2  
532 (Nashchekin et al., 2016; Wang et al., 2015). TPX2 was reported to phase separate  
533 into a co-condensate with tubulin which enhances microtubule nucleation through the  
534 spatial coordination (King and Petry, 2020). CAMSAP2 may utilize the similar  
535 strategy that should be further confirmed in the future.

536

537 In the centrosomal aster,  $\gamma$ -TuRC serves as a template to help  $\alpha\beta$ -tubulins align for  
538 formation of a 13-protofilament microtubule structure in a process called templated  
539 nucleation (Moritz et al., 1995; Roostalu and Surrey, 2017; Wiczorek et al., 2020;  
540 Zheng et al., 1995). Each Cam2-aster resembles the centrosomal aster, as described  
541 above, but the molecular behaviours inside the condensate, the centre of Cam2-aster,  
542 are completely different from those in the centrosomal aster. In the condensate, large

543 numbers of tubulin rings and sheets exist, and CAMSAP2 mainly localizes inside the  
544 rings. Therefore, CAMSAP2 induces and stabilizes microtubule polymerization  
545 intermediates. Microtubules grow rapidly from the condensates, with the numbers of  
546 tubulin rings decreasing inversely (Figure 6B). Thus, the rings shown here apparently  
547 form at the rapid growing phase of microtubules, and it is reasonable to conclude that  
548 rings are used as materials to form the initial short tubulin sheets and the  
549 microtubules. However, tubulin rings have long been thought to be microtubule  
550 depolymerization products (Erickson, 1996). We could not find the differences of  
551 curvatures between the rings in the current study and previously observed  
552 depolymerized products. Indeed, McIntosh et al. also reported that electron  
553 tomography analyses showed the curvatures of protofilaments on growing and  
554 shrinking microtubules are similar (McIntosh et al., 2018). Hence, the curvatures of  
555 tubulin oligomers or the protofilaments in the growing and shrinking phases are still  
556 under debate and further high resolution structural studies on tubulin rings complexed  
557 with CAMSAP2 are necessary to confirm the functions of the rings as microtubule  
558 nucleation intermediates.

559

560 How tubulin rings are produced in the presence of CAMSAP2 remains elusive. The  
561 CKK domain of CAMSAPs has been reported to bridge two tubulin dimers in  
562 neighbouring protofilaments (Atherton et al., 2017). This binding pattern apparently  
563 does not support the single ring formation. In this respect, cryo-EM structure of TPX-  
564 2 microtubule complex provides us the possible insight (Zhang et al., 2017). TPX-2  
565 uses two elements, ridge and wedge, to stabilize the longitudinal and the lateral  
566 contacts of microtubule. CKK of CAMSAP2 stabilizes the lateral contacts (Atherton  
567 et al., 2017). Considering that both CC3 and CKK are necessary to stimulate the



568 microtubule nucleation, CC3 may stabilize the longitudinal contact of tubulins to  
569 support the protofilament ring formation. This hypothesis needs to be clarified by the  
570 future high resolution structural study of CAMSAP-microtubule complex.

571

572 The role of CAMSAP2 is likely to stimulate the process of spontaneous nucleation of  
573 microtubules, which is thought to start with the formation of longitudinal contacts  
574 between  $\alpha\beta$ -tubulin dimers (Roostalu and Surrey, 2017). Considering all of our data,  
575 we propose a model of spontaneous nucleation mediated by CAMSAP2 (Figure 8).

576 First, CAMSAP2 interacts with tubulins, inducing their longitudinal stack formation  
577 until they form protofilament rings. This step can occur on ice. Incubation at 37 °C  
578 induces co-condensation of CAMSAP2 and tubulins to stimulate the efficient  
579 formation of microtubule nucleation intermediates, forming a nucleation centre.

580 Plenty of nucleation intermediates such as rings, intermediates between ring and  
581 sheet, sheets, are produced inside the condensates. How these nucleation

582 intermediates grow into the critical nucleus for microtubule formation is still

583 uncertain (Erickson and Pantaloni, 1981). From the nucleation centre, many

584 microtubules efficiently radiate outward using the nucleation intermediates as

585 materials, producing the Cam2-aster. In this stage, CAMSAP2 also decorates

586 microtubule lattice around the minus-end to induce efficient elongation of

587 microtubules. Microtubules from neighbouring asters then join together and generate

588 a microtubule meshwork among Cam2-asters, finally building the cytoskeletal

589 framework.

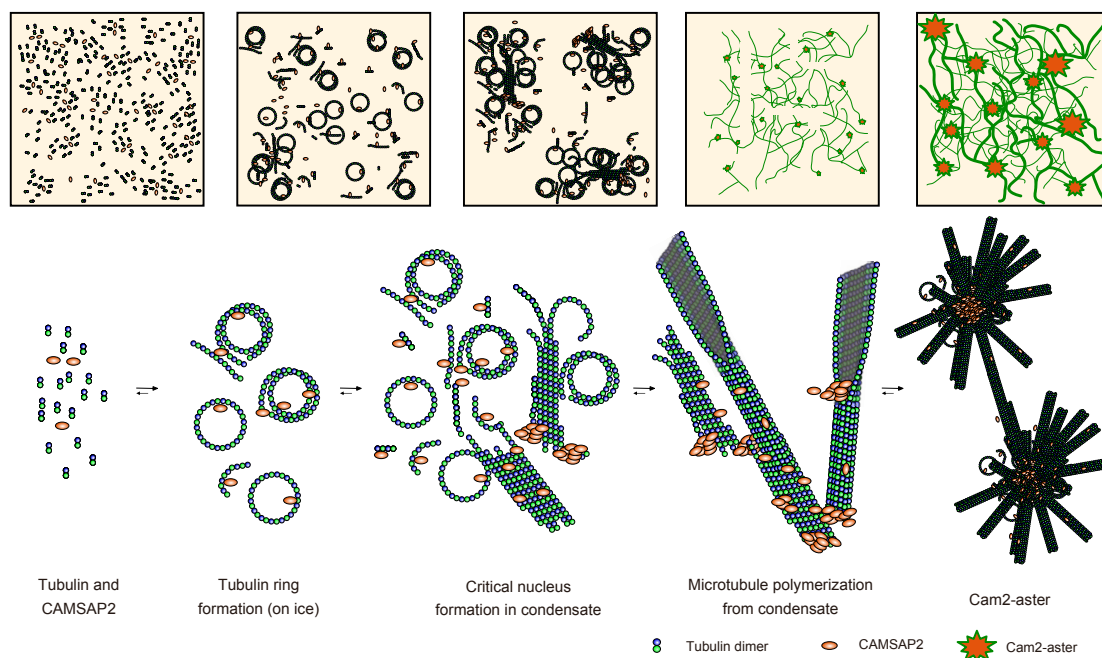

**Figure 8.** Structural model of microtubule nucleation and Cam2-aster formation induced by CAMSAP2. Structural model of tubulin nucleation, polymerization, and aster formation induced by CAMSAP2, as detailed in the main text. CAMSAP2 shifts the equilibrium to the right, as indicated by the arrow size.

Previous studies have indicated that microtubule growth occurs from CAMSAP foci (Nashchekin et al., 2016), and in differentiated epithelial cells, microtubules are anchored to the adherens junctions or apical cortices where CAMSAPs are concentrated (Toya et al., 2016). No  $\gamma$ -TuRC localization has been observed at these foci. Our *in vitro* data provide some insight into how CAMSAPs induce microtubule polymerization at CAMSAP-containing structures. At 50 nM, which is nearly a physiological concentration of CAMSAP proteins in cells (Liebermeister and Klipp, 2006; Wühr et al., 2014), CAMSAP2 binds to the minus-ends of microtubules but does not induce MT polymerization *in vitro* (Hendershott and Vale, 2014; Jiang et al., 2014) (Figures 1C and 3). However, we showed that in the presence of artificial CAMSAP2-containing clusters fixed on glass slides, the same concentration of CAMSAP2 could sufficiently induce microtubule polymerization from soluble

609 tubulins *in vitro* (Figure 3). Thus, to support microtubule polymerization from  
610 particular structures, both CAMSAP-containing foci and soluble CAMSAP appear to  
611 be required.

612

613 In vertebrate cells, CAMSAPs generally decorate a single microtubule at its minus  
614 end, not inducing aster formation. Nevertheless, it has been shown that clusters of  
615 Patronin, the *Drosophila* homologue of CAMSAP, radiate multiple microtubules at  
616 the same time (Nashchekin et al., 2016), as observed for the Cam2-asters described  
617 here, which suggests that Cam2-aster formation may not be a purely *in vitro* event. It  
618 is possible that excess clustering of CAMSAPs and tubulins is prohibited *in vivo*  
619 through unidentified mechanisms, and CAMSAP-mediated enhancement of  
620 microtubule growth, the mechanisms of which were uncovered in this study, likely  
621 also works *in vivo* by forming a smaller or minimal unit of the CAMSAP/tubulin  
622 complex. Our findings of the interactions between CAMSAP2 and tubulins reported  
623 here using *in vitro* systems should provide insights for future studies seeking to  
624 deepen our understanding of their molecular roles in non-centrosomal microtubule  
625 network formation in living cells.

626

## 627 References

- 628 Akhmanova A, Steinmetz MO. 2019. Microtubule minus-end regulation at a glance. *J*  
629 *Cell Sci* **132**:jcs227850. doi:10.1242/jcs.227850
- 630 Akhmanova A, Steinmetz MO. 2015. Control of microtubule organization and  
631 dynamics: two ends in the limelight. *Nat Rev Mol Cell Biol* **16**:711–726.  
632 doi:10.1038/nrm4084
- 633 Akhmanova A, Steinmetz MO. 2008. Tracking the ends: a dynamic protein network  
634 controls the fate of microtubule tips. *Nat Rev Mol Cell Biol* **9**:309–322.  
635 doi:10.1038/nrm2369
- 636 Al-Bassam J. 2014. Reconstituting Dynamic Microtubule Polymerization Regulation  
637 by TOG Domain Proteins Methods in Enzymology. Elsevier. pp. 131–148.  
638 doi:10.1016/B978-0-12-397924-7.00008-X
- 639 Alushin GM, Lander GC, Kellogg EH, Zhang R, Baker D, Nogales E. 2014. High-  
640 Resolution Microtubule Structures Reveal the Structural Transitions in  $\alpha$ -  
641 Tubulin upon GTP Hydrolysis. *Cell* **157**:1117–1129.  
642 doi:10.1016/j.cell.2014.03.053
- 643 Atherton J, Jiang K, Stangier MM, Luo Y, Hua S, Houben K, van Hooff JJE, Joseph  
644 A-P, Scarabelli G, Grant BJ, Roberts AJ, Topf M, Steinmetz MO, Baldus M,  
645 Moores CA, Akhmanova A. 2017. A structural model for microtubule minus-  
646 end recognition and protection by CAMSAP proteins. *Nat Struct Mol Biol*  
647 **24**:931–943. doi:10.1038/nsmb.3483
- 648 Atherton J, Luo Y, Xiang S, Yang C, Rai A, Jiang K, Stangier M, Vemu A, Cook AD,  
649 Wang S, Roll-Mecak A, Steinmetz MO, Akhmanova A, Baldus M, Moores  
650 CA. 2019. Structural determinants of microtubule minus end preference in  
651 CAMSAP CKK domains. *Nat Commun* **10**:5236. doi:10.1038/s41467-019-  
652 13247-6
- 653 Castoldi M, Popov AV. 2003. Purification of brain tubulin through two cycles of  
654 polymerization–depolymerization in a high-molarity buffer. *Protein Expr*  
655 *Purif* **32**:83–88. doi:10.1016/S1046-5928(03)00218-3
- 656 Chuang M, Goncharov A, Wang S, Oegema K, Jin Y, Chisholm AD. 2014. The  
657 Microtubule Minus-End-Binding Protein Patronin/PTRN-1 Is Required for  
658 Axon Regeneration in *C. elegans*. *Cell Rep* **9**:874–883.  
659 doi:10.1016/j.celrep.2014.09.054
- 660 Dammermann A, Desai A, Oegema K. 2003. The minus end in sight. *Curr Biol*  
661 **13**:R614–R624. doi:10.1016/S0960-9822(03)00530-X
- 662 Desai A, Mitchison TJ. 1997. MICROTUBULE POLYMERIZATION DYNAMICS.  
663 *Annu Rev Cell Dev Biol* **13**:83–117. doi:10.1146/annurev.cellbio.13.1.83
- 664 Erickson HP. 1996. Protofilaments and rings, two conformations of the tubulin family  
665 conserved from bacterial FtsZ to alpha/beta and gamma tubulin. *J Cell Biol*  
666 **135**:5–8. doi:10.1083/jcb.135.1.5
- 667 Erickson HP, Pantaloni D. 1981. The role of subunit entropy in cooperative assembly.  
668 Nucleation of microtubules and other two-dimensional polymers. *Biophys J*  
669 **34**:293–309. doi:10.1016/S0006-3495(81)84850-3
- 670 Goodwin SS, Vale RD. 2010. Patronin Regulates the Microtubule Network by  
671 Protecting Microtubule Minus Ends. *Cell* **143**:263–274.  
672 doi:10.1016/j.cell.2010.09.022
- 673 Hannak E, Oegema K, Kirkham M, Gönczy P, Habermann B, Hyman AA. 2002. The  
674 kinetically dominant assembly pathway for centrosomal asters in

- 675 Caenorhabditis elegans is  $\gamma$ -tubulin dependent. *J Cell Biol* **157**:591–602.  
676 doi:10.1083/jcb.200202047
- 677 Hendershott MC, Vale RD. 2014. Regulation of microtubule minus-end dynamics by  
678 CAMSAPs and Patronin. *Proc Natl Acad Sci* **111**:5860–5865.  
679 doi:10.1073/pnas.1404133111
- 680 Howard J, Hyman AA. 2003. Dynamics and mechanics of the microtubule plus end.  
681 *Nature* **422**:753–758. doi:10.1038/nature01600
- 682 Imasaki T, Wenzel S, Yamada K, Bryant ML, Takagi Y. 2018. Titer estimation for  
683 quality control (TEQC) method: A practical approach for optimal production  
684 of protein complexes using the baculovirus expression vector system. *PLOS*  
685 *ONE* **13**:e0195356. doi:10.1371/journal.pone.0195356
- 686 Jiang K, Faltova L, Hua S, Capitani G, Prota AE, Landgraf C, Volkmer R, Kammerer  
687 RA, Steinmetz MO, Akhmanova A. 2018. Structural Basis of Formation of the  
688 Microtubule Minus-End-Regulating CAMSAP-Katanin Complex. *Structure*  
689 **26**:375–382.e4. doi:10.1016/j.str.2017.12.017
- 690 Jiang K, Hua S, Mohan R, Grigoriev I, Yau KW, Liu Q, Katrukha EA, Altelaar AFM,  
691 Heck AJR, Hoogenraad CC, Akhmanova A. 2014. Microtubule Minus-End  
692 Stabilization by Polymerization-Driven CAMSAP Deposition. *Dev Cell*  
693 **28**:295–309. doi:10.1016/j.devcel.2014.01.001
- 694 King MR, Petry S. 2020. Phase separation of TPX2 enhances and spatially  
695 coordinates microtubule nucleation. *Nat Commun* **11**:270.  
696 doi:10.1038/s41467-019-14087-0
- 697 Kremer JR, Mastrorade DN, McIntosh JR. 1996. Computer Visualization of Three-  
698 Dimensional Image Data Using IMOD. *J Struct Biol* **116**:71–76.  
699 doi:10.1006/jsbi.1996.0013
- 700 Kuchnir Fygenon D, Flyvbjerg H, Sneppen K, Libchaber A, Leibler S. 1995.  
701 Spontaneous nucleation of microtubules. *Phys Rev E* **51**:5058–5063.  
702 doi:10.1103/PhysRevE.51.5058
- 703 Liebermeister W, Klipp E. 2006. Bringing metabolic networks to life: integration of  
704 kinetic, metabolic, and proteomic data. *Theor Biol Med Model* **3**:42.  
705 doi:10.1186/1742-4682-3-42
- 706 Marcette JD, Chen JJ, Nonet ML. 2014. The Caenorhabditis elegans microtubule  
707 minus-end binding homolog PTRN-1 stabilizes synapses and neurites. *eLife*  
708 **3**:e01637. doi:10.7554/eLife.01637
- 709 Martin M, Veloso A, Wu J, Katrukha EA, Akhmanova A. 2018. Control of  
710 endothelial cell polarity and sprouting angiogenesis by non-centrosomal  
711 microtubules. *eLife* **7**:e33864. doi:10.7554/eLife.33864
- 712 McIntosh JR, O’Toole E, Morgan G, Austin J, Ulyanov E, Ataulakhanov F,  
713 Gudimchuk N. 2018. Microtubules grow by the addition of bent guanosine  
714 triphosphate tubulin to the tips of curved protofilaments. *J Cell Biol*  
715 **217**:2691–2708. doi:10.1083/jcb.201802138
- 716 Meng W, Mushika Y, Ichii T, Takeichi M. 2008. Anchorage of Microtubule Minus  
717 Ends to Adherens Junctions Regulates Epithelial Cell-Cell Contacts. *Cell*  
718 **135**:948–959. doi:10.1016/j.cell.2008.09.040
- 719 Moritz M, Braunfeld MB, Sedat JW, Albertst B, Agard DA. 1995. Microtubule  
720 nucleation by  $\gamma$ -tubulin-containing rings in the centrosome. *Nature* **378**:638–  
721 640.
- 722 Nashchekin D, Fernandes AR, St Johnston D. 2016. Patronin/Shot Cortical Foci  
723 Assemble the Noncentrosomal Microtubule Array that Specifies the



- 724 *Drosophila* Anterior-Posterior Axis. *Dev Cell* **38**:61–72.  
725 doi:10.1016/j.devcel.2016.06.010
- 726 Nogales E, Whittaker M, Milligan RA, Downing KH. 1999. High-Resolution Model  
727 of the Microtubule. *Cell* **96**:79–88. doi:10.1016/S0092-8674(00)80961-7
- 728 Noordstra I, Liu Q, Nijenhuis W, Hua S, Jiang K, Baars M, Remmelzwaal S, Martin  
729 M, Kapitein LC, Akhmanova A. 2016. Control of apico–basal epithelial  
730 polarity by the microtubule minus-end-binding protein CAMSAP3 and  
731 spectraplakins ACF7. *J Cell Sci* **129**:4278–4288. doi:10.1242/jcs.194878
- 732 O’Toole E, Greenan G, Lange KI, Srayko M. 2012. The Role of  $\gamma$ -Tubulin in  
733 Centrosomal Microtubule Organization. *PLoS ONE* **7**:e29795.  
734 doi:10.1371/journal.pone.0029795
- 735 Pongrakhananon V, Saito H, Hiver S, Abe T, Shioi G, Meng W, Takeichi M. 2018.  
736 CAMSAP3 maintains neuronal polarity through regulation of microtubule  
737 stability. *Proc Natl Acad Sci* **115**:9750–9755. doi:10.1073/pnas.1803875115
- 738 Punjani A, Rubinstein JL, Fleet DJ, Brubaker MA. 2017. cryoSPARC: algorithms for  
739 rapid unsupervised cryo-EM structure determination. *Nat Methods* **14**:290–  
740 296. doi:10.1038/nmeth.4169
- 741 Richardson CE, Spilker KA, Cueva JG, Perrino J, Goodman MB, Shen K. 2014.  
742 PTRN-1, a microtubule minus end-binding CAMSAP homolog, promotes  
743 microtubule function in *Caenorhabditis elegans* neurons. *eLife* **3**:e01498.  
744 doi:10.7554/eLife.01498
- 745 Roostalu J, Cade NI, Surrey T. 2015. Complementary activities of TPX2 and chTOG  
746 constitute an efficient importin-regulated microtubule nucleation module. *Nat*  
747 *Cell Biol* **17**:1422–1434. doi:10.1038/ncb3241
- 748 Roostalu J, Surrey T. 2017. Microtubule nucleation: beyond the template. *Nat Rev*  
749 *Mol Cell Biol* **18**:702–710. doi:10.1038/nrm.2017.75
- 750 Sampaio P, Rebollo E, Varmark H, Sunkel CE. 2001. Organized microtubule arrays  
751 in  $\gamma$ -tubulin-depleted *Drosophila* spermatocytes. *Curr Biol* **11**:1788–1793.
- 752 Schneider CA, Rasband WS, Eliceiri KW. 2012. NIH Image to ImageJ: 25 years of  
753 image analysis. *Nat Methods* **9**:671–675. doi:10.1038/nmeth.2089
- 754 Seki E, Matsuda N, Yokoyama S, Kigawa T. 2008. Cell-free protein synthesis system  
755 from *Escherichia coli* cells cultured at decreased temperatures improves  
756 productivity by decreasing DNA template degradation. *Anal Biochem*  
757 **377**:156–161. doi:10.1016/j.ab.2008.03.001
- 758 Tanaka N, Meng W, Nagae S, Takeichi M. 2012. Nezha/CAMSAP3 and CAMSAP2  
759 cooperate in epithelial-specific organization of noncentrosomal microtubules.  
760 *Proc Natl Acad Sci* **109**:20029–20034. doi:10.1073/pnas.1218017109
- 761 Toya M, Kobayashi S, Kawasaki M, Shioi G, Kaneko M, Ishiuchi T, Misaki K, Meng  
762 W, Takeichi M. 2016. CAMSAP3 orients the apical-to-basal polarity of  
763 microtubule arrays in epithelial cells. *Proc Natl Acad Sci* **113**:332–337.  
764 doi:10.1073/pnas.1520638113
- 765 Voter WA, Erickson HP. 1984. The Kinetics of Microtubule Assembly. *J Biol Chem*  
766 **259**:10430–10438.
- 767 Wang S, Wu D, Quintin S, Green RA, Cheerambathur DK, Ochoa SD, Desai A,  
768 Oegema K. 2015. NOCA-1 functions with  $\gamma$ -tubulin and in parallel to Patronin  
769 to assemble non-centrosomal microtubule arrays in *C. elegans*. *eLife*  
770 **4**:e08649. doi:10.7554/eLife.08649
- 771 Wieczorek M, Bechstedt S, Chaaban S, Brouhard GJ. 2015. Microtubule-associated  
772 proteins control the kinetics of microtubule nucleation. *Nat Cell Biol* **17**:907–  
773 916. doi:10.1038/ncb3188

- 774 Wieczorek M, Urnavicius L, Ti S-C, Molloy KR, Chait BT, Kapoor TM. 2020.  
775 Asymmetric Molecular Architecture of the Human  $\gamma$ -Tubulin Ring Complex.  
776 *Cell* **180**:165–175. doi:10.1016/j.cell.2019.12.007
- 777 Wu J, de Heus C, Liu Q, Bouchet BP, Noordstra I, Jiang K, Hua S, Martin M, Yang  
778 C, Grigoriev I, Katrukha EA, Altelaar AFM, Hoogenraad CC, Qi RZ,  
779 Klumperman J, Akhmanova A. 2016. Molecular Pathway of Microtubule  
780 Organization at the Golgi Apparatus. *Dev Cell* **39**:44–60.  
781 doi:10.1016/j.devcel.2016.08.009
- 782 Wühr M, Freeman RM, Presler M, Horb ME, Peshkin L, Gygi SP, Kirschner MW.  
783 2014. Deep Proteomics of the *Xenopus laevis* Egg using an mRNA-Derived  
784 Reference Database. *Curr Biol* **24**:1467–1475. doi:10.1016/j.cub.2014.05.044
- 785 Yau KW, van Beuningen SFB, Cunha-Ferreira I, Cloin BMC, van Battum EY, Will  
786 L, Schätzle P, Tas RP, van Krugten J, Katrukha EA, Jiang K, Wulf PS,  
787 Mikhaylova M, Harterink M, Pasterkamp RJ, Akhmanova A, Kapitein LC,  
788 Hoogenraad CC. 2014. Microtubule Minus-End Binding Protein CAMSAP2  
789 Controls Axon Specification and Dendrite Development. *Neuron* **82**:1058–  
790 1073. doi:10.1016/j.neuron.2014.04.019
- 791 Zhang R, Roostalu J, Surrey T, Nogales E. 2017. Structural insight into TPX2-  
792 stimulated microtubule assembly. *eLife* **6**:e30959. doi:10.7554/eLife.30959
- 793 Zheng Y, Wong ML, Alberts B. 1995. Nucleation of microtubule assembly by a  $\gamma$ -  
794 tubulin-containing ring complex. *Nature* **378**:578–583.  
795

## 796 **Materials and Methods**

797

### 798 Tubulin preparation

799 Tubulin was purified from porcine brain tissue (Castoldi and Popov, 2003). The purified  
800 tubulin was labelled with 5(6)-carboxytetramethylrhodamine succinimidyl ester (TMR)  
801 (Santa Cruz Biotechnology, Dallas, TX, USA) or *N*-[6-(biotinamide)hexanoyl]-6-  
802 aminohexanoic acid *N*-succinimidyl ester (Biotin-LC-LC-NHS) (Tokyo Chemical Industry,  
803 Tokyo, Japan) as described previously (Al-Bassam, 2014).

804

### 805 Cloning and construct design

806 The full-length mouse CAMSAP2 gene was PCR-amplified from the CAMSAP2-GFP  
807 plasmid (Toya et al., 2016) and subcloned between the EcoRI and XhoI restriction sites of the  
808 pFastBac1 vector (ThermoFisher Scientific). GFP fusion CAMSAP2 full-length with His-  
809 Strep tag was generated from PCR-amplify genes of CAMSAP2 gene from CAMSAP2-GFP  
810 plasmid (Toya et al., 2016), GFP tag gene from CAMSAP2-GFP plasmid (Toya et al., 2016),  
811 His-Strep2- tag from 438-SNAP-V3 vector a gift from Scott Gradia (Addgene plasmid #  
812 55223) with inserting  
813 CATCATCATCATCACAGCAGCGGCCTGGTGCCGCGCGGCAGCCAT sequence  
814 right in front of Strep II gene by PCR primer, and assembled into PCR amplified pFastBac  
815 vector by NEBuilder HiFi DNA assembly (NEB). CAMSAP2 mutant constructs were  
816 generated by inserting each mouse CAMSAP2 partial PCR fragment flanked by a TEV  
817 protease recognition linker (ENLYFQGSSGSSG) and a hepta-His tag at the N-terminus and  
818 C-terminus, respectively, into the pGFPS1 vector (Seki et al., 2008). This construct contains  
819 another metal-binding motif similar to the HAT tag (KDHLIHNHHKHEHAHA) at the N-  
820 terminus of the GFPS1 gene. The coding regions of all constructs were verified by Sanger  
821 sequencing.

822

### 823 Protein expression



824 Full-length CAMSAP2 was expressed in the baculovirus expression vector system (BEVS)  
825 using insect cells. Bacmid preparation and V0 and V1 virus production were performed as  
826 described previously. The protein was expressed by Sf9 cells after infection with the V1 virus  
827 following the TEQC protocol (Imasaki et al., 2018). Other CAMSAP2 deletion constructs,  
828 summarized in Table 1, were expressed in *Escherichia coli*. The resulting constructs were  
829 transformed into *E. coli* strain KRX (Promega) and cultured in LB medium containing 100  
830  $\mu\text{g/ml}$  ampicillin, 0.05% glucose and 0.1% rhamnose at 25 °C overnight with autoinduction.  
831 Each cell suspension was harvested into a 50 ml tube and stored at -80 °C.

832

### 833 Protein purification

834 For purification of the *E. coli*-expressed constructs, we applied the protocol described below.  
835 *E. coli* cells were thawed, resuspended in lysis buffer (40 mM Na-phosphate buffer (pH 7.4),  
836 400 mM NaCl, 5 mM imidazole, 14 mM  $\beta$ -mercaptoethanol, 0.7  $\mu\text{M}$  leupeptin, 2  $\mu\text{M}$   
837 pepstatin A, 1 mM PMSF, and 2 mM benzamidin), and lysed by sonication. The lysate was  
838 clarified by centrifugation (16,000  $\times g$ ), and the supernatant was applied to a HIS-Select  
839 Nickel Affinity Gel column (Sigma) equilibrated in lysis buffer. The column was washed  
840 with  $\sim 10$  column volumes of lysis buffer containing 5 mM imidazole. His-tagged proteins  
841 were eluted with  $\sim 4$  column volumes of lysis buffer containing 150 mM imidazole. The  
842 elution fractions were pooled and diluted with water to  $\sim 150$  mM NaCl for cation exchange  
843 chromatography. The diluted solutions were clarified by centrifugation using an Avanti  
844 JXN30 centrifuge (Beckman Coulter) with a JA30.50 Ti rotor at 20,000  $\times g$  and applied to a  
845 HiTrap SP HP column (GE Healthcare; 1 ml) equilibrated in buffer A (20 mM Na-phosphate  
846 buffer (pH 7.0), 1 mM Na-EDTA, and 1 mM DTT) containing 150 mM NaCl. The column  
847 was washed with the same buffer until a stable baseline was reached. Proteins were eluted  
848 with a 20 ml linear gradient from 150 mM to 500 mM at a flow rate of 0.5 ml/min using an  
849 ÄKTA Pure instrument (GE Healthcare). The fractions containing the target proteins were  
850 pooled and concentrated to less than 0.5 ml using an Amicon Ultra concentrator (Merck  
851 Millipore; 10 kDa MWCO). The concentrate was applied to a Superdex 200 Increase 10/300

852 GL size exclusion chromatography column (GE Healthcare) equilibrated in sizing buffer (20  
853 mM HEPES-KOH pH 7.5, 300 mM NaCl, and 1 mM DTT) at a flow rate of 0.4 ml/min. The  
854 peak fractions were pooled, concentrated with an Amicon Ultra 10 kDa MWCO concentrator,  
855 flash-frozen in liquid nitrogen and stored at -80 °C until use.

856 For constructs expressed in insect cells through BEVS, cells were thawed, resuspended in  
857 BEVS lysis buffer containing 50 mM HEPES-KOH pH 7.5, 400 mM KCl, 5 mM imidazole,  
858 10% glycerol, 5 mM  $\beta$ -mercaptoethanol, 0.7  $\mu$ M leupeptin, 2  $\mu$ M pepstatin A, 1 mM PMSF,  
859 and 2 mM benzamidine, and lysed by sonication. The lysate was centrifuged using an Avanti  
860 JXN30 (Beckman Coulter) with a JA30.50 Ti rotor at 28,000 rpm (94,830  $\times g$ ), and the  
861 supernatant was applied to a HIS-Select Nickel Affinity Gel column (Sigma) equilibrated in  
862 lysis buffer. The column was washed by passing through 20 resin volumes of lysis buffer.  
863 The bound proteins were eluted with lysis buffer containing 300 mM imidazole. The eluate  
864 was concentrated by an Amicon Ultra 10 kDa MWCO concentrator and applied to a  
865 Superose6 Increase 10/300 GL size exclusion chromatography column equilibrated in sizing  
866 buffer (50 mM HEPES-KOH pH 7.5, 400 mM KCl, 10% glycerol, and 5 mM DTT). The  
867 peak fractions were pooled, concentrated by an Amicon Ultra 10 kDa MWCO concentrator,  
868 flash-frozen in liquid nitrogen, and stored at -80 °C. The quality of the samples was assessed  
869 by SDS-PAGE (Figure 1B, C).

870

#### 871 Protein conjugation of gold nanoparticles

872 Twenty-three microlitres of a 10-nm diameter gold nanoparticle suspension (Sigma cat. No.  
873 752584) was mixed with 1  $\mu$ l of 100 mM Tris-HCl pH 8.5 to adjust the pH for conjugation.  
874 The purified protein or BSA in parallel control experiments was diluted to 15  $\mu$ M in sizing  
875 buffer containing 1 M KCl. Six microlitres of the diluted protein solution was added slowly to  
876 the gold nanoparticle suspension under constant mixing by gentle vortexing. The mixture was  
877 left on ice for 30 min and subjected to the negative stain EM analysis. No noticeable colour  
878 change of the conjugate suspension, which would indicate aggregation, was observed during  
879 the experiments.

880

881 Spontaneous nucleation assay (pelleting assay)

882 The method was based on that in Wieczorek et al. with some modifications (Wieczorek et al.,  
883 2015). For the assay testing tubulin alone, the indicated concentrations of tubulin in PEM  
884 buffer supplemented with 1 mM GTP (PEM GTP) were incubated on ice for 30 min and then  
885 at 37 °C for 30 min. Total samples for SDS-PAGE were prepared at this stage. These samples  
886 were centrifuged in a TOMY MX-307 for 30 min at 15,000 rpm and 35 °C. The supernatant  
887 was discarded, and PEM GTP was supplemented for washing, centrifugation, and recovery of  
888 the pellet. The pellets were resuspended in cold PEM GTP, incubated on ice for 30 min for  
889 depolymerization, and centrifuged for 30 min at 15,000 rpm and 4 °C to remove aggregates or  
890 debris. The supernatants were resolved on SDS-PAGE gels, and the bands were quantified by  
891 FIJI (ImageJ) (Schneider et al., 2012) using a standard made from tubulin aliquots loaded at  
892 1, 2, 3, and 5 μM. For tubulin with CAMSAP2, an assay was performed following the  
893 methods of the tubulin-only pelleting assay except that 1 μM CAMSAP2 was added at the  
894 initial polymerization step, and CAMSAP2 sizing buffer was used for depolymerization.

895

896 Preparation of GMPCPP seeds

897 TAMRA-tubulin (2.5 μM) and biotin-LC-LC-tubulin (2.5 μM) were polymerized in 100 μl of  
898 PEM buffer supplemented with 1 mM GMPCPP and 1 mM DTT at 37 °C for 20 min. Equal  
899 amounts of prewarmed PEM buffer were added, and the mixtures were ultracentrifuged at  
900 80,000 rpm for 5 min at 30 °C using a TLA100 rotor and an Optima TLX ultracentrifuge  
901 (Beckman). The microtubule pellets were resuspended in PEM supplemented with 1 mM  
902 DTT. The GMPCPP seeds were aliquoted into PCR tubes (NIPPON Genetics, Tokyo, Japan),  
903 snap-frozen in liquid N<sub>2</sub> and stored at -80 °C. The GMPCPP seeds were quickly thawed at  
904 37 °C immediately before use.

905

906 Binding of CAMSAP2 on dynamic microtubules

907 Coverslips (#1.5H thickness, 22 x 22 mm; Thorlabs Japan, Tokyo, Japan) were washed by  
908 ultrasonic bath in 1 M HCl (Fujifilm Wako, Tokyo, Japan) for 3 hours, in deionized distilled  
909 water (DDW) for 3 hours and 1 hour, in 70% ethanol for 1 hour and then in 99.5% ethanol for  
910 1 hour. Flow chambers were prepared at room temperature. The flow chambers were  
911 constructed with double-sided tape (Nichiban, Tokyo, Japan). The volume of each flow  
912 chamber was approximately 15  $\mu$ l. The chambers were incubated with 0.5 mg/ml PLL-PEG-  
913 biotin (SuSoS, Dübendorf, Switzerland) for 10 min followed by 0.5 mg/ml streptavidin  
914 (Fujifilm Wako, Tokyo, Japan) for 2 min. The GMPCPP seeds were incubated for 5 min and  
915 washed with 50  $\mu$ l of assay buffer (100 mM PIPES pH 6.8, 100 mM KCl, 2 mM MgCl<sub>2</sub>, 1  
916 mM EGTA, 0.5% Pluronic F-127, 0.1 mg/ml Biotin-BSA, 0.2 mg/ml  $\kappa$ -casein). Then, 10  $\mu$ M  
917 tubulin, 0.5  $\mu$ M TAMRA-tubulin and 50 nM CAMSAP2 in assay buffer supplemented with  
918 10 nM protocatechuate-3,4-dioxygenase (PCD) (Oriental Yeast, Tokyo, Japan), 2.5 mM  
919 protocatechuic acid (PCA) (Fujifilm Wako) and 1 mM Trolox (Fujifilm Wako) was added  
920 into the chamber and observed by total internal reflection fluorescent (TIRF) microscopy at  
921 37 °C. The TIRF system consisted of a Ti2E microscope (Nikon, Tokyo, Japan) equipped  
922 with a Ti2-LAPP TIRF system (Nikon), an iXon Life 897 EMCCD camera (Andor), a CFI  
923 Apochromat TIRF lens (NA 1.49, x100) (Nikon) and a heating stage (Tokai Hit, Fujinomiya,  
924 Japan). Images were obtained every 5 seconds for 20 min.

925

#### 926 Time-lapse imaging of CAMSAP2-dependent aster formation

927 PLL-PEG-biotin coating was performed as described above. Instead of GMPCPP MTs, a  
928 biotinylated anti-GFP antibody (MBL, Tokyo, Japan) diluted 1:10 in PEM buffer  
929 supplemented with 100 mM KCl was added into the chamber and incubated for 2 min. The  
930 chamber was washed with 50  $\mu$ l of assay buffer. CAMSAP2-GFP (0.5  $\mu$ M) diluted in assay  
931 buffer was incubated for 5 min, and the chamber was washed with 50  $\mu$ l of assay buffer again.  
932 Next, 10  $\mu$ M tubulin, 0.5  $\mu$ M TAMRA-tubulin and the indicated concentrations of  
933 CAMSAP2 in assay buffer supplemented with 10 nM PCD, 2.5 mM PCA and 1 mM Trolox

934 were added into the chamber and were observed by TIRF microscopy as described above.

935 Observation was performed at 37 °C. Images were obtained every 5 seconds for 20 min.

936

937 Grid preparation and data collection for negative stain electron microscopy

938 Samples, including tubulin, CAMSAP2, and/or CAMSAP2 mutant samples, were diluted

939 with PEM buffer (100 mM PIPES pH 6.8, 1 mM MgCl<sub>2</sub>, 1 mM EGTA, and 1 mM GTP) and

940 incubated on ice for 30 min before blotting. The copolymerized samples were mixed,

941 incubated on ice for 30 min, and then transferred to 37 °C for 1, 3, 10, or 30 min. After

942 incubation, 4 µl of each sample was applied to a glow-discharged carbon-coated 200-mesh

943 Cu grid (EM Japan). Any excess solution was wicked off with filter paper as soon as possible.

944 The grid was stained with 2% uranyl acetate, the excess stain was blotted with filter paper,

945 and the grid was air-dried. The specimens were observed using a JEM-1400Plus electron

946 microscope (JEOL) operated at 120 kV and equipped with a JEOL Matataki CMOS camera at

947 nominal magnifications of 600-, 10,000-, 20,000-, and 40,000-fold.

948

949 Grid preparation for cryo-electron microscopy

950 Next, 30 µM tubulin and 3 µM full-length CAMSAP2 or CC1-CKK in PEM buffer (100 mM

951 PIPES-KOH pH 6.8, 1 mM MgCl<sub>2</sub>, 1 mM EGTA, and 1 mM GTP) were mixed and incubated

952 on ice for 30 min. For induction of microtubule polymerization, the samples were further

953 incubated at 37 °C for 1 min or at 37 °C for 3 min. All samples were placed onto glow-

954 discharged R2/2 Quantifoil 300-mesh Cu grids with carbon support film, blotted with filter

955 paper (Whatman No. 1) for 2 sec, and plunge-frozen in liquid ethane with a Vitrobot Mark IV

956 (ThermoFisher Scientific).

957

958 Cryo-electron microscopy

959 Data acquisition was performed by using a Glacios Cryo Transmission Electron Microscope

960 operated at 200 kV with a Falcon III EC Direct Electron Detector (ThermoFisher Scientific) at

961 28,000-fold nominal magnification. A total of 176 micrographs were collected with a total



962 dose of  $20 \text{ e}^-/\text{\AA}^2$  at a pixel size of  $3.57 \text{ \AA}$ . For the 2D classification, 5,881 particles in total  
963 were manually picked from 89 micrographs and subjected to two rounds of reference-free 2D  
964 classification in cryoSPARC (Punjani et al., 2017).

965

#### 966 Cryo-electron tomography

967 A Titan Krios 300 kV transmission electron microscope equipped with a Falcon II Direct  
968 Electron Detector (ThermoFisher Scientific) at nominal magnifications of 11,000-fold (for  
969 mature asters) and 14,000-fold (for growing asters) was used for 3D structure analysis. A  
970 cryo-ET tilt series was recorded with TEM Tomography Data Acquisition software. The dose  
971 for one image was calculated as  $1.5 \text{ electrons}/\text{\AA}^2$ . The tilt series was obtained using a Saxton  
972 scheme with steps of 3 degrees up to  $\pm 70$  degrees. Sixty-seven micrographs were taken for  
973 one series; the total dose was approximately  $100 \text{ e}^-/\text{\AA}^2$  at pixel sizes of  $7.4 \text{ \AA}$  (for mature  
974 asters) and  $5.9 \text{ \AA}$  (for growing asters). The tilt series images were reconstructed into 3D  
975 tomograms by using the IMOD software package (Kremer et al., 1996). The micrographs  
976 were aligned by cross-correlation and then aligned by tracking 20 nm gold fiducial beads  
977 coated on the grid. The aligned micrographs were reconstructed for visual analysis using  
978 IMOD SIRT. CTF correction was not performed. Particles from exemplary classes are  
979 displayed in Figure 6E-I.

980

981

#### 982 **Acknowledgements:**

983 We thank R.J. McKenney at UC Davis for providing the full-length GFP-CAMSAP2 construct  
984 and N. Kajimura for helping with the electron microscopy data collection at the Research  
985 Center for Ultra-High-Voltage Electron Microscopy (Nanotechnology Open Facilities) at  
986 Osaka University. We are also grateful to K. Ikegami for his critical reading of the manuscript.  
987 We thank K. Chin for her research management support. This work was supported by the  
988 Nanotechnology Platform of the MEXT, Japan; the RIKEN Pioneering Project “Dynamic  
989 Structural Biology”; and the Platform Project for Supporting Drug Discovery and Life Science

990 Research (Basis for Supporting Innovative Drug Discovery and Life Science Research  
991 (BINDS)) from AMED under Grant Number JP18am0101082. We acknowledge support from  
992 the Japan Society for the Promotion of Science (KAKENHI; 19K07246 to T. I., 25221104 to  
993 M. T., and 15K08168 to R. N.), AMED-CREST from the Japan Agency for Medical Research  
994 and Development (1005341 to R. N.), the Japan Science and Technology Agency/PRESTO  
995 (JPMJPR14L2 to T. I.), the Takeda Science Foundation to T. I. and R. N., the Mochida  
996 Memorial Foundation for Medical and Pharmaceutical Research to T. I. and R. N., the Uehara  
997 Memorial Foundation to R. N., Bristol-Myers Squibb to R. N., and the Hyogo Science and  
998 Technology Association to R. N.

999

#### 1000 **Competing interests**

1001 The authors declare that no competing interests exist.

1002

#### 1003 **Contributions:**

1004 T. I., S. N., M. S., M. T. and R. N. conceived the project. T. I., S. K., Y. S. H., M. A., A. S., Y.  
1005 T., N. S., S. T., Y. Y., T. S., Y. S., T. S. and E. N. performed DNA construction, biochemical  
1006 analyses, and cell experiments. S. N. performed TIRF assays. T. I., H. S., K. A., K. M. and R.  
1007 N. performed the cryo-EM data collection and analysis. T. I., S. K., S. N., and R. N. prepared  
1008 the figures. All authors discussed the results, and T. I., S. K., S. N., M. T. and R. N. wrote the  
1009 manuscript.

1010

#### 1011 **Corresponding author**

1012 Correspondence and requests for materials should be addressed to [ryonitta@med.kobe-u.ac.jp](mailto:ryonitta@med.kobe-u.ac.jp)  
1013 and [shinsuke.niwa.c8@tohoku.ac.jp](mailto:shinsuke.niwa.c8@tohoku.ac.jp).

**Table 1.** List of protein expression constructs used in this study

| <b>ID</b> | <b>construct</b> | <b>amino acids</b> | <b>vector</b> | <b>tag (N-terminal)</b> | <b>tag (C-terminal)</b> |
|-----------|------------------|--------------------|---------------|-------------------------|-------------------------|
| RN82      | full length      | 1–1472             | pFastBac1     | none                    | 6x His                  |
| RN63      | CC1-CKK          | 696–1454           | pGFPS1        | HAT*-GFPS1-TEV*         | 7x His                  |
| RN64      | CC3-CKK          | 1157–1454          | pGFPS1        | HAT*-GFPS1-TEV*         | 7x His                  |
| RN136     | CKK              | 1332–1472          | pGFPS1        | HAT*-GFPS1-TEV*         | 7x His                  |
| RN189     | full length      | 1–1472             | pFastBac1     | His_Strep2-3Csite       | none                    |

1014

1015 \*These tags carry modifications. See the Methods for details.

1016
